# Supplementary material for: Global impacts of future urban expansion on terrestrial vertebrate diversity
Source: PubMed Central journal article supplement (PMC8956596; doi:10.1038/s41467-022-29324-2), 2022-03-25
Supplement: 41467_2022_29324_MOESM1_ESM.pdf [file 41467_2022_29324_MOESM1_ESM.pdf]

# Supplementary Information

## Global impacts of future urban expansion on terrestrial biodiversity

Guangdong Li<sup>1,2\*</sup>, Chuanglin Fang<sup>1,2\*</sup>, Yingjie Li<sup>3</sup>, Zhenbo Wang<sup>1,2</sup>, Siao Sun<sup>1,2</sup>,  
Sanwei He<sup>4</sup>, Wei Qi<sup>1,2</sup>, Chao Bao<sup>1,2</sup>, Haitao Ma<sup>1,2</sup>, Yupeng Fan<sup>1,2</sup>, Yuxue Feng<sup>1</sup>,  
Xiaoping Liu<sup>5,6\*</sup>

### Affiliations

<sup>1</sup> Key Laboratory of Regional Sustainable Development Modeling, Institute of Geographic Sciences and Natural Resources Research (IGSNRR), Chinese Academy of Sciences (CAS), Beijing, China

<sup>2</sup> College of Resources and Environment, University of Chinese Academy of Sciences, Beijing, China

<sup>3</sup> Center for Systems Integration and Sustainability, Department of Fisheries and Wildlife, Environmental Science and Policy Program, Michigan State University, East Lansing, MI, USA

<sup>4</sup> School of Public Administration, Zhongnan University of Economics and Law, Wuhan, China

<sup>5</sup> Guangdong Provincial Key Laboratory of Urbanization and Geo-simulation, School of Geography and Planning, Sun Yat-sen University, Guangzhou, China

<sup>6</sup> Southern Marine Science and Engineering Guangdong Laboratory (Zhuhai), Zhuhai, China.

\* To whom correspondence should be addressed. Email: ligd@igsnrr.ac.cn (G.L.); fangcl@igsnrr.ac.cn (C.F.); liuxp3@mail.sysu.edu.cn (X.L.)

## **Supplementary Note 1: Research design description**

Biodiversity refers to the variety of organisms from all sources, including inter alia, terrestrial, marine, and other aquatic ecosystems and the ecological complexes they comprise. Thus, biodiversity is an ecological complex that includes not only the diversity of species but also the diversity of ecosystems. Accordingly, biodiversity conservation is a multi-dimensional process that requires us not only to protect species, but also to protect their habitat and the surrounding environment. In this study, we focused on terrestrial biodiversity and combined different indicators for terrestrial biodiversity (i.e., habitat loss, habitat fragmentation, and species loss) to analyze how terrestrial biodiversity is affected by future urban expansion. We considered habitat loss and fragmentation mainly because habitat changes are closely related to species changes. Indeed, species rely on habitat to survive, and habitat loss and fragmentation are major causes of species loss. Thus, we first examined how future urban land expansion affects direct loss of natural habitat. To clarify the impacts of future urban growth on habitat loss in key and hotspot biodiversity areas, i.e., the world's most important places for species and their habitats (e.g., protected areas, biodiversity hotspots, Global 200, and the Last of the Wild areas), we also investigated the impacts of future urban expansion on biodiversity prioritization schemes. Second, we examined habitat fragmentation that is captured by edge proximity, edge density, and isolation. Finally, we focus on the species and examined the effects of future urban expansion on species richness, species abundance, and number of species. We believe that by using multiple indicators of biodiversity, we can comprehensively examine the how future urban expansion will affect biodiversity. Given the multiple dimensions of biodiversity, one indicator is not sufficient for providing a broader picture.

## **Supplementary Note 2: Full SSP description of urbanization pattern**

The five shared socioeconomic pathways (SSPs) characterize a wide range of possible future development pathways with different trends in various domains (e.g., rate of urbanization). Below, we describe the different pathways in detail:

- **SSP1 (Sustainability):** SSP1 envisions a development path of rapid urbanization with high income growth for all country groups, including high-, middle-, and low-income countries. Urbanization is partly driven by a desire to promote environment-friendly living conditions, and compact urban form that helps improve resource efficiency<sup>1-3</sup>. Rural-to-urban migration is moderate. Urbanization is well managed to minimize urban sprawl and urban de-concentration<sup>4</sup>. Cities become stable incubators and enablers of sustainable practices<sup>5</sup>. Global urbanization rate is high and is expected to reach 92.6% by 2100.
- **SSP2 (Middle of the road):** SSP2 envisions a development path of moderate urbanization and moderate income growth for all country groups<sup>1</sup>. Urbanization growth trends vary by region and over time, but on average they are closer to the center of expectations for future outcomes than to the upper or lower bounds of possibilities<sup>4</sup>. Urbanization has been particularly transformative in East and South Asia and sub-Saharan Africa. As a result of sustainable energy technologies and related designs, the transformation of cities has proceeded at different rates, with the highest rates in developed or rapidly developing cities<sup>5</sup>. Global urbanization rate is moderate and is expected to reach 79.7% by 2100.
- **SSP3 (Regional rivalry):** SSP3 envisions a development path with slow urbanization for all country groups. Slow economic growth limits employment opportunities and cross-regional mobility, thus constraining the process of urbanization. Moreover, poor urban planning reduces the attractiveness of urban areas as destinations<sup>1,6</sup>. Developing countries face greater challenges in urbanization process, because the inequality and fragmentation in developing countries tend to cause mixed patterns of urban change (e.g., wealthier and dispersed settlements, more concentrated slum-type growth)<sup>4</sup>. Disadvantaged

populations, however, continue to migrate to poorly planned settlements around large urban areas, particularly in low-income countries<sup>5</sup>. Global urbanization rate is very low and is expected to reach 58.4% by 2100.

- **SSP4 (Inequality):** SSP4 envisions that high-income countries will experience moderate urbanization, whereas medium- and low-income countries will experience fast urbanization. In high-income countries, moderate economic growth and appealing urban conditions in cities with a high elite population tend to support urbanization, but rapid aging due to low fertility rate has weakened rural-urban migration<sup>7</sup>. In contrast, high fertility rate in medium- and low-income countries produces age structures that facilitate migration from rural to urban areas. In medium-income countries, there is medium economic growth, and cities act as manufacturing centers and engines of economic growth, which facilitate rapid urbanization<sup>8</sup>. In low-income countries, rapid population growth, along with the shrinkage in land and other resources, has stimulated migration from rural areas to urban areas<sup>9</sup>. Meanwhile, large income disparities, which particularly occur between rural and urban areas, result in large flows of migration to urban areas<sup>10</sup>. Cities are affected by high inequality, such that the elite groups are provided with urban amenities but the rest of the population are provided with poor housing and infrastructure, which further leads to massive expansion of slums and high unemployment rates<sup>1,11</sup>. Spatial development patterns vary across cities, with some cities dominated by urban sprawl, whereas better planning in cities that are predominantly inhabited by the higher income classes leads to more concentrated development<sup>4</sup>. Urbanization rate is high and is expected to reach 91.7% by 2100.
- **SSP5 (Fossil-fueled development):** SSP5 envisions that all country groups will experience rapid urbanization. The rapid economic growth and advancement in technologies that have enabled the development of desirable housing have made urban areas attractive destinations. Even if population growth rates decline, increases in agricultural productivity and wealth growth will lead to greater migration to cities and more urban labor force<sup>1,6</sup>. Unlike SSP1, however, urban



planning and land use management has difficulty to keep up with the rapid pace of urbanization in the first decades of this century, and sprawling patterns of development dominate <sup>4</sup>. Over time, the pace of urbanization has converged, and urban structures and forms have evolved worldwide to reflect historical patterns and prevailing local and national policies. This includes densely populated megacities in densely populated countries, as well as metropolitan areas with significant urban sprawl in other parts of the world <sup>5</sup>. Urbanization rate is high and is expected to reach 93.0% by 2100.

### **Supplementary Note 3: Global urban expansion to 2100**

Based on the global projection of urban expansion with five SSPs<sup>12</sup>, about 36~74 million hectares (Mha) of areas with urban development potential are expected to be urbanized by 2100. Moreover, the degree of future urban expansion is substantially different across five SSPs (Supplementary Fig. 1): Scenario SSP5 (fossil-fueled development pathway<sup>13</sup>) will undergo the greatest urban land conversion, followed by SSP2 (middle pathway between SSP1 and SSP3<sup>14</sup>), SSP1 (sustainable pathway<sup>15</sup>), and SSP4 (divided pathway<sup>16</sup>), whereas scenario SSP3 (regional rivalry pathway<sup>17</sup>) yields a minimal size of urban expansion. Notably, the United States will undergo the greatest urban land increase in scenarios SSP1, SSP2, and SSP5. However, for scenarios SSP3 and SSP4, the largest growth is predicted to occur in low-income countries located in sub-Saharan Africa (except for South Africa). Similarly, the urban growth rate (about 262 - 574% in scenarios between SSP1 and SSP4) is also the highest in these countries. In terms of spatial distribution, future urban expansion will concentrate in existing and newly-developed highly urbanized areas, such as metropolitans, and urban agglomerations around global South and North.

#### **Supplementary Note 4: Protected Area Data**

Data on the boundaries of protected areas are from the 2020 May World Database on Protected Areas<sup>18</sup>. We included the protected areas with specific geographic information in the database and excluded those that are only represented by points. Many of the protected areas overlap spatially but contain different IUCN categories. To eliminate these overlaps and avoid double counting of protected areas, we followed the World Database on Protected Areas User Manual (WDPA\_WDOECM\_Manual\_1\_6) and previous studies<sup>19</sup> to dissolve the overlapping areas into a single polygon, and designated the overlapping area as the strictest IUCN category of all protected areas at that location.

### **Supplementary Note 5: Global urban expansion in protected areas**

Protected areas serve as the core tool and cornerstone of global biodiversity conservation, yet the protected area boundaries within the World Database on Protected Areas (WDPA) do not fully resolve inholdings (e.g., existing cities, towns, or private ownership of lands). To ensure the robustness of our results, we further utilized high-resolution (with 30m resolution) global urban expansion datasets<sup>20-23</sup> to identify urban expansion or human settlement changes within protected areas.

Through overlapping analysis between terrestrial protected area boundaries of WDPA and urban expansion datasets (from 1972 to 2019), we still found a considerable amount of urban land or human settlement within protected areas (1,9504 km<sup>2</sup> and accounts for 2.04% of the total urban area of the world). Moreover, we confirm that many urban areas (or privately owned lands) are growing within the protected areas, and protected habitats within these protected areas also experienced obvious conversion. This is because 38% of the urban land use changes within protected areas were due to the conversion of natural habitats into urban land between 1992 and 2015 based on the CCI-LC data. Therefore, there is an urgent need to gradually reduce human disturbance and urban expansion within the protected areas, and to explore the coordinated symbiosis of urban development and biodiversity conservation.

### **Supplementary Note 6: Biodiversity Hotspots Data**

Biodiversity hotspots are places on Earth that are both rich in biological resources and deeply threatened. To meet the criteria of a biodiversity hotspot, an area must (a) include at least 1,500 endemic vascular plant species that exist nowhere else on the planet, and (b) have 30% or less of its original natural vegetation (i.e., threatened)<sup>24</sup>. Based on these two criteria, 36 ecoregions have been identified as biodiversity hotspots<sup>25</sup>, and the success of species conservation in these ecoregions has greatly impact in protecting global biodiversity.

### **Supplementary Note 7: Global 200 Data**

WWF's Global 200 project<sup>26</sup> examined global patterns of biodiversity to identify the Earth's terrestrial, freshwater, and marine ecoregions that possess exceptional biodiversity and represent their ecosystems. This project placed each ecoregion on Earth in a system of 30 biomes and biogeographic realms to facilitate further representation. It also compared the biodiversity characteristics (e.g., species richness, endemic species, unusual higher taxa, unusual ecological or evolutionary phenomena, and global rarity of habitats) of different ecoregions to evaluate their irreplaceability. This process yielded 238 ecoregions (i.e., the Global 200), including 142 terrestrial, 53 freshwater and 43 marine priority ecoregions (<https://www.worldwildlife.org/publications/global-200>). Effectively protecting these ecoregions will help preserve the planet's most representative biodiversity habitats.

### **Supplementary Note 8: Last of the Wild Areas Data**

According to the Human Footprint Index dataset, Last of the Wild (version 2)<sup>27</sup> represents the areas of major terrestrial biomes that are least affected by humans or wild areas. The wildest areas in each biome were defined as areas with a Human Footprint Index value of less than or equal to 10. The 10 largest polygons with more than 5 square kilometers within each biome were selected and identified as wild areas. Last of the Wild provides up-to-date geographical projection maps of wild areas that can be used for designing wildlife conservation programs, effective management of natural resources, and research on the relationship between humans and their environment.

## **Supplementary Note 9: PREDICTS**

The modelled mean estimates of the relative percentage of biodiversity change for each Land System were based on biodiversity data from the database of the PREDICT (Projecting Responses of Ecological Diversity In Changing Terrestrial Systems) Project<sup>28</sup>. The PREDICTS collated inter-site comparisons of ecological assemblage composition from published studies or unpublished datasets to study the impact of human activity on more than one named taxon. Extracts from this database were completed on April 28, 2015. This extract includes 2.38 million records from 413 published sources or unpublished datasets, documenting the occurrence or abundance of 39123 species at 18659 sites in all 14 terrestrial biomes in the world. The site-level data used to build the models are publicly available from the Natural History Museum's Data Portal (<https://www.nhm.ac.uk/our-science/our-work/biodiversity/predicts.html>). These data are reasonably representative of the major taxa and terrestrial biomes. For studies where sampling effort varied across sampling sites, abundance values were corrected through dividing them by sampling effort (i.e., assuming that abundance increases linearly with effort). The database includes more than 1% of the total number of all described species, and more than 1% of described species within many taxa. Hudson et al.<sup>18</sup> only present data in which (a) species abundance, species occurrence, or species richness was measured at two or more sampling sites and/or times, and (b) all sites were sampled using the same procedure and the same workload or site-specific workload data. They preferentially use the geographic coordinates in the file or those provided by the data provider; however, in cases where the coordinates are not available, they geo-reference from the map in the file. The final dataset was drawn from 378 studies and two unpublished datasets. The resulting dataset contains data on 26,953 species at 11,525 sites. A full description of how datasets are assembled and managed was provided elsewhere<sup>28</sup>.



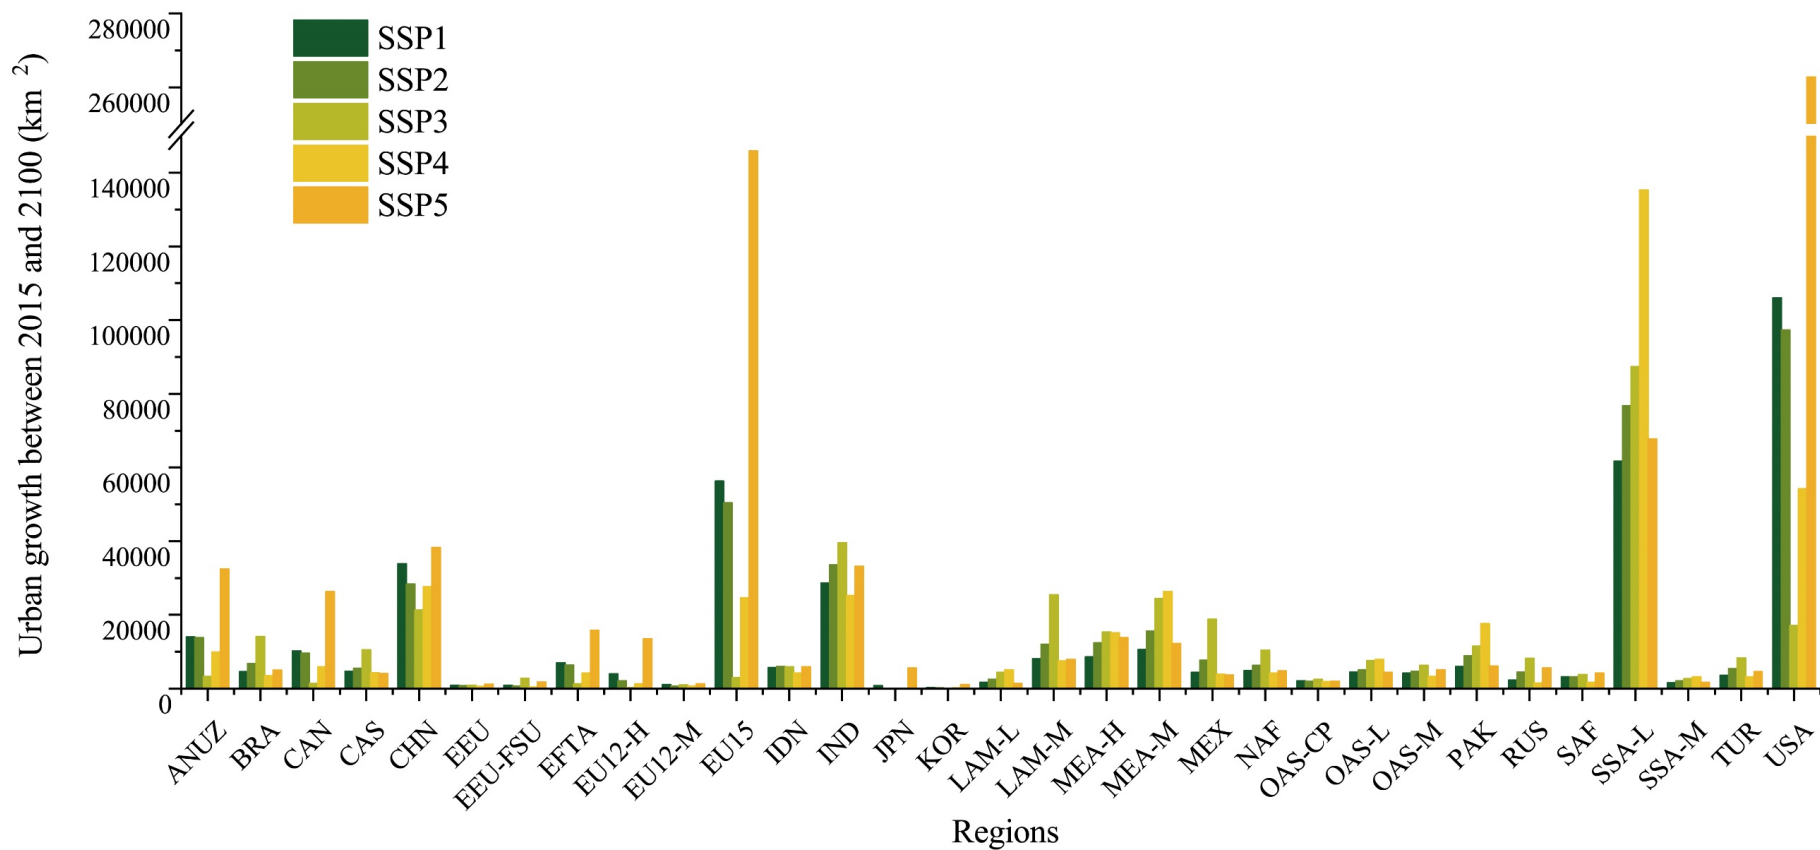

**Supplementary Fig. 1 Urban expansion projections by 2100 under SSP scenarios.** These 32 macro regions are defined as follows: ANUZ = Australia and New Zealand. BRA = Brazil. CAN = Canada. CAS = countries in Central Asia, including Armenia, Azerbaijan, Georgia, Kazakhstan, Kyrgyzstan, Tajikistan, Turkmenistan, and Uzbekistan. CHN = China (Mainland, Hongkong, Macao; excl. Taiwan), including China, Hong Kong SAR (China), Macao SAR (China).

EEU = Eastern Europe (excl. former Soviet Union and EU member states), including Albania, Bosnia and Herzegovina, Croatia, Montenegro, Serbia, The former Yugoslav Republic of Macedonia. EEU-FSU = Eastern Europe, former Soviet Union (excl. Russia and EU members). Belarus, Republic of Moldova, Ukraine. EFTA = Iceland, Norway, and Switzerland. EU12-H = New EU member states that joined as of 2004 - high income. Cyprus, Czech Republic, Estonia, Hungary, Malta, Poland, Slovakia, Slovenia. EU12-M = medium-income New EU member states that joined as of 2004, including Bulgaria, Latvia, Lithuania, and Romania. EU15 = European Union member states that joined prior to 2004, including Austria, Belgium, Denmark, Finland, France, Germany, Greece, Ireland, Italy, Luxembourg, Netherlands, Portugal, Spain, Sweden, and United Kingdom. IDN = Indonesia. IND = India. JPN = Japan. KOR = Republic of Korea. LAM-L = low-income countries in Latin America (excl. Brazil, Mexico), including Belize, Guatemala, Haiti, Honduras, and Nicaragua. LAM-M = medium- and high-income countries in Latin America (excl. Brazil, Mexico), including Antigua and Barbuda, Argentina, Bahamas, Barbados, Bermuda, Bolivia (Plurinational State of), Chile, Colombia, Costa Rica, Cuba, Dominica, Dominican Republic, Ecuador, El Salvador, French Guiana, Grenada, Guadeloupe, Guyana, Jamaica, Martinique, Netherlands Antilles, Panama, Paraguay, Peru, Saint Kitts and Nevis, Saint Lucia, Saint Vincent and the Grenadines, Suriname, Trinidad and Tobago, Uruguay, and Venezuela (Bolivarian Republic of). MEA-H = high-income countries in Middle East Asia, including Bahrain, Israel, Kuwait, Oman, Qatar, Saudi Arabia, and United Arab Emirates. MEA-M = low- and medium-income countries in Middle East Asia, including Iran (Islamic Republic of), Iraq, Jordan, Lebanon, Occupied Palestinian Territory, Syrian Arab Republic, and Yemen. MEX = Mexico. NAF = countries in North Africa, including Algeria, Egypt, Libyan Arab Jamahiriya, Morocco, Tunisia, and Western Sahara. OAS-CPA = countries in Other Asia (i.e., former Centrally Planned Asia), including Cambodia, Lao People's Democratic Republic, Mongolia, and Viet Nam. OAS-L = low-income countries in Other Asia, including Bangladesh, Democratic People's Republic of Korea, Fiji, Micronesia (Fed. States of), Myanmar, Nepal, Papua New Guinea, Philippines, Samoa, Solomon Islands, Timor-Leste, Tonga, and Vanuatu. OAS-M = medium- and high-income countries in Other Asia, including Bhutan, Brunei Darussalam, French Polynesia, Guam, Malaysia, Maldives, New Caledonia, Singapore, Sri Lanka, and Thailand. PAK = Pakistan and Afghanistan. RUS = Russian Federation. SAF = South Africa. SSA-L = low-income countries in Sub Sahara Africa (excl. South Africa), including Benin, Burkina Faso, Burundi, Cameroon, Cape Verde, Central African Republic, Chad, Comoros, Congo, Côte d'Ivoire, Democratic Republic of the Congo, Djibouti, Eritrea, Ethiopia, Gambia, Ghana, Guinea, Guinea-Bissau, Kenya, Lesotho, Liberia, Madagascar, Malawi, Mali, Mauritania, Mozambique, Niger, Nigeria, Rwanda, Sao Tome and Principe, Senegal, Sierra Leone, Somalia, South Sudan, Sudan, Swaziland, Togo, Uganda, United Republic of Tanzania, Zambia, and Zimbabwe. SSA-M = medium- and high-income countries of Sub Sahara Africa (excl. South Africa), including Angola, Botswana, Equatorial Guinea, Gabon, Mauritius, Mayotte, Namibia, Réunion, and Seychelles. TUR = Turkey. TWN = Taiwan. USA = United States of America. Includes: Puerto Rico, United States Virgin Islands, United States of America.

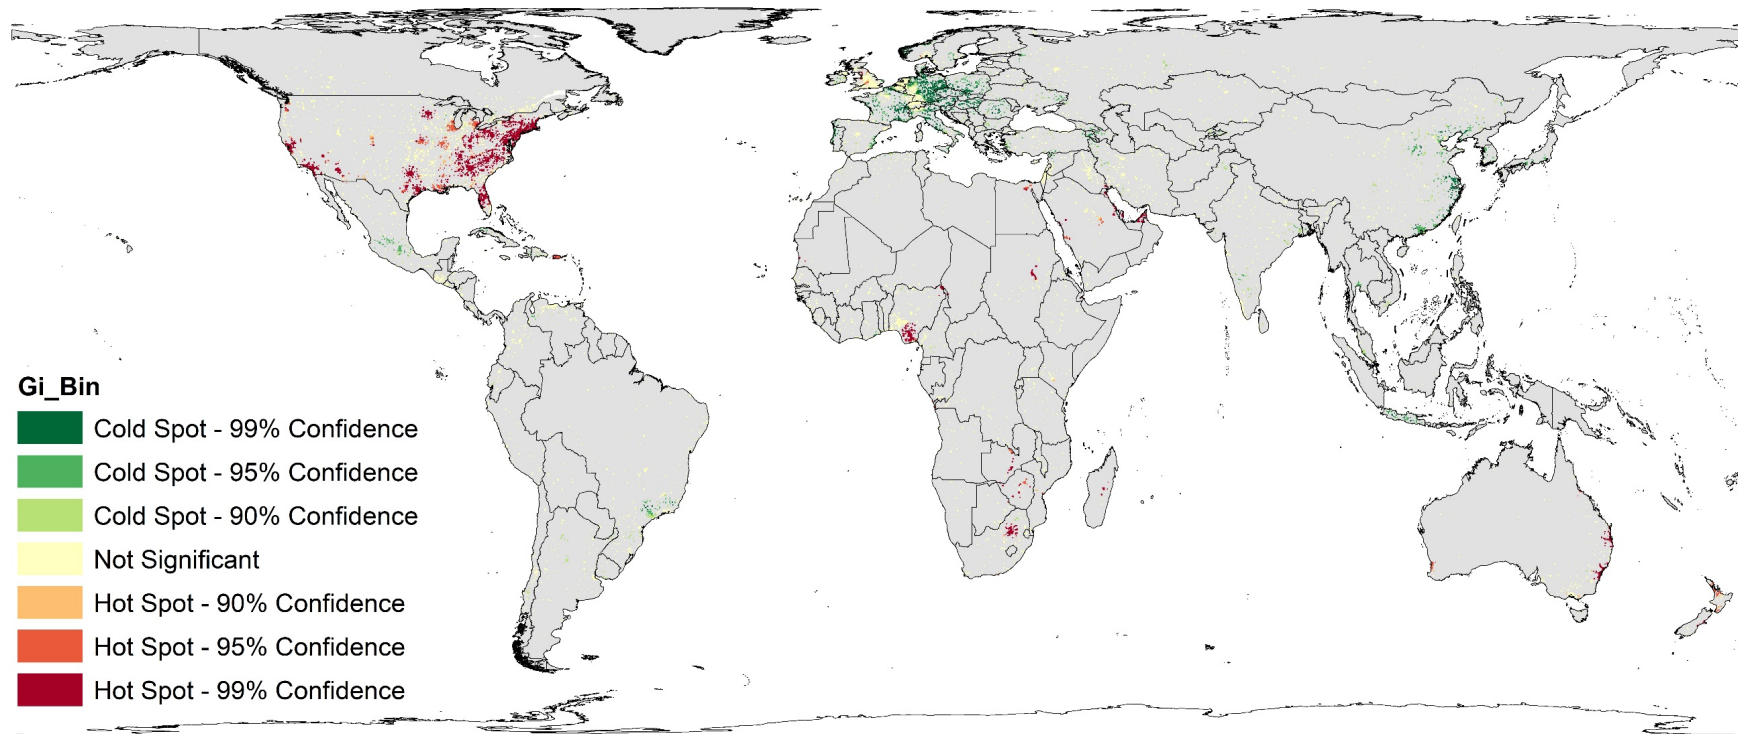

**Supplementary Fig. 2 Future hot spots and cold spots of habitat loss due to urban expansion under SSP1.** The Hot Spot Analysis (Getis-Ord Gi\*) tool in ArcGIS Pro 2.5 was used. This tool identifies statistically significant spatial clusters of high values (hot spots) and low values (cold spots). Potential habitat loss due to future urban expansion was input variable. The Gi\_Bin identifies statistically significant hot and cold spots. Statistical significance was based on the *P*-value and *Z*-score (two-sided), and no adjustments were made for multiple comparisons.

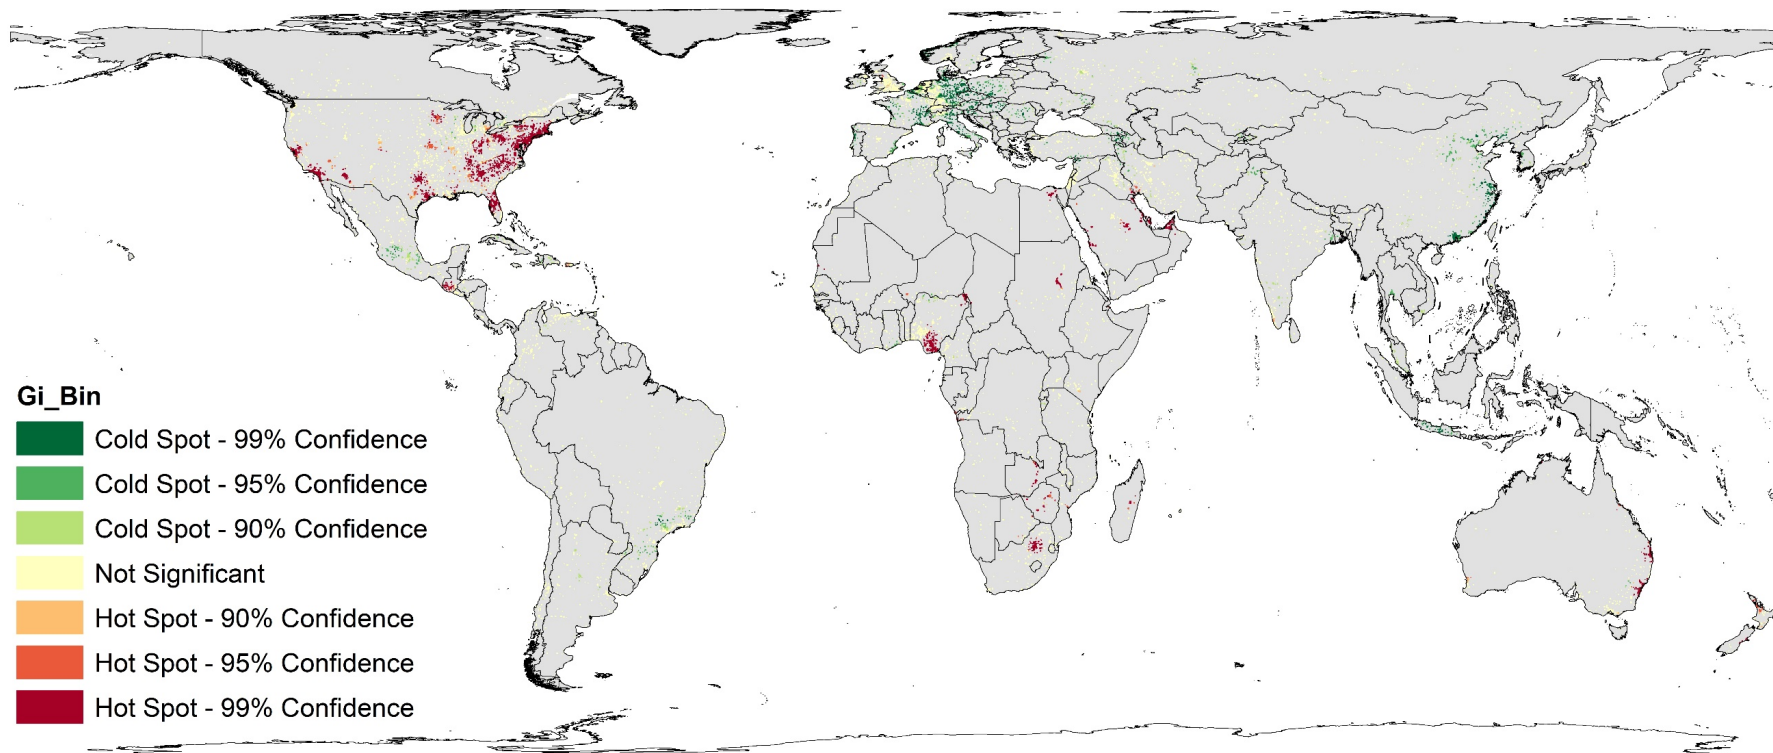

**Supplementary Fig. 3 Future hot-spots and coldspots of habitat loss due to urban expansion under SSP2.** The Hot Spot Analysis (Getis-Ord  $G_i^*$ ) tool in ArcGIS Pro 2.5 was used. This tool identifies statistically significant spatial clusters of high values (hot spots) and low values (cold spots). Potential habitat loss due to future urban expansion was input variable. The  $G_i$ \_Bin identifies statistically significant hot and cold spots. Statistical significance was based on the  $P$ -value and  $Z$ -score (two-sided), and no adjustments were made for multiple comparisons.

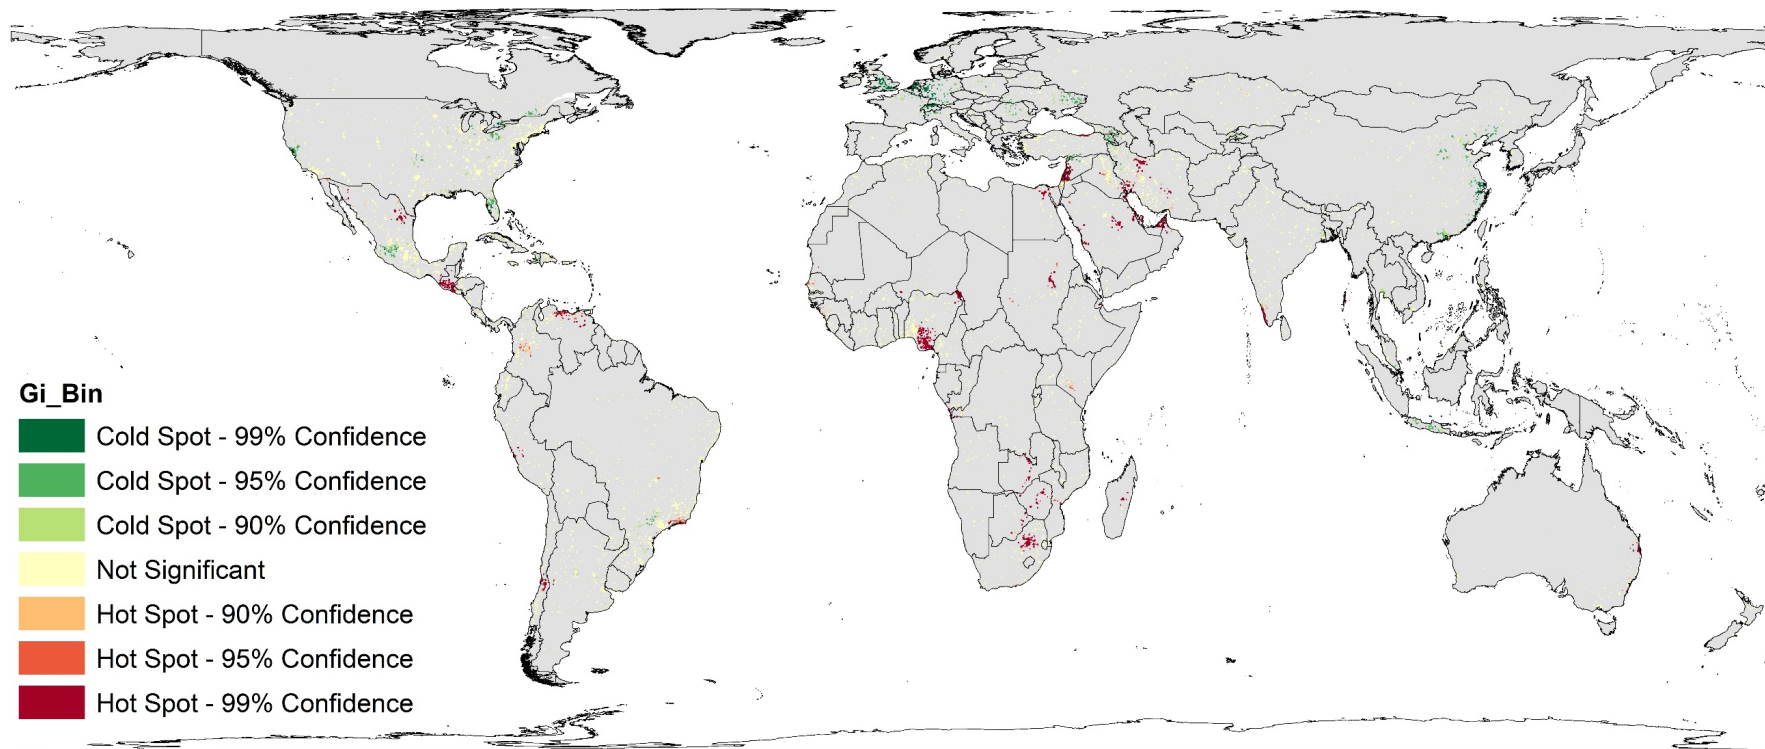

**Supplementary Fig. 4 Future hot-spots and coldspots of habitat loss due to urban expansion under SSP3.** The Hot Spot Analysis (Getis-Ord  $G_i^*$ ) tool in ArcGIS Pro 2.5 was used. This tool identifies statistically significant spatial clusters of high values (hot spots) and low values (cold spots). Potential habitat loss due to future urban expansion was input variable. The  $G_i$ \_Bin identifies statistically significant hot and cold spots. Statistical significance was based on the  $P$ -value and  $Z$ -score (two-sided), and no adjustments were made for multiple comparisons.

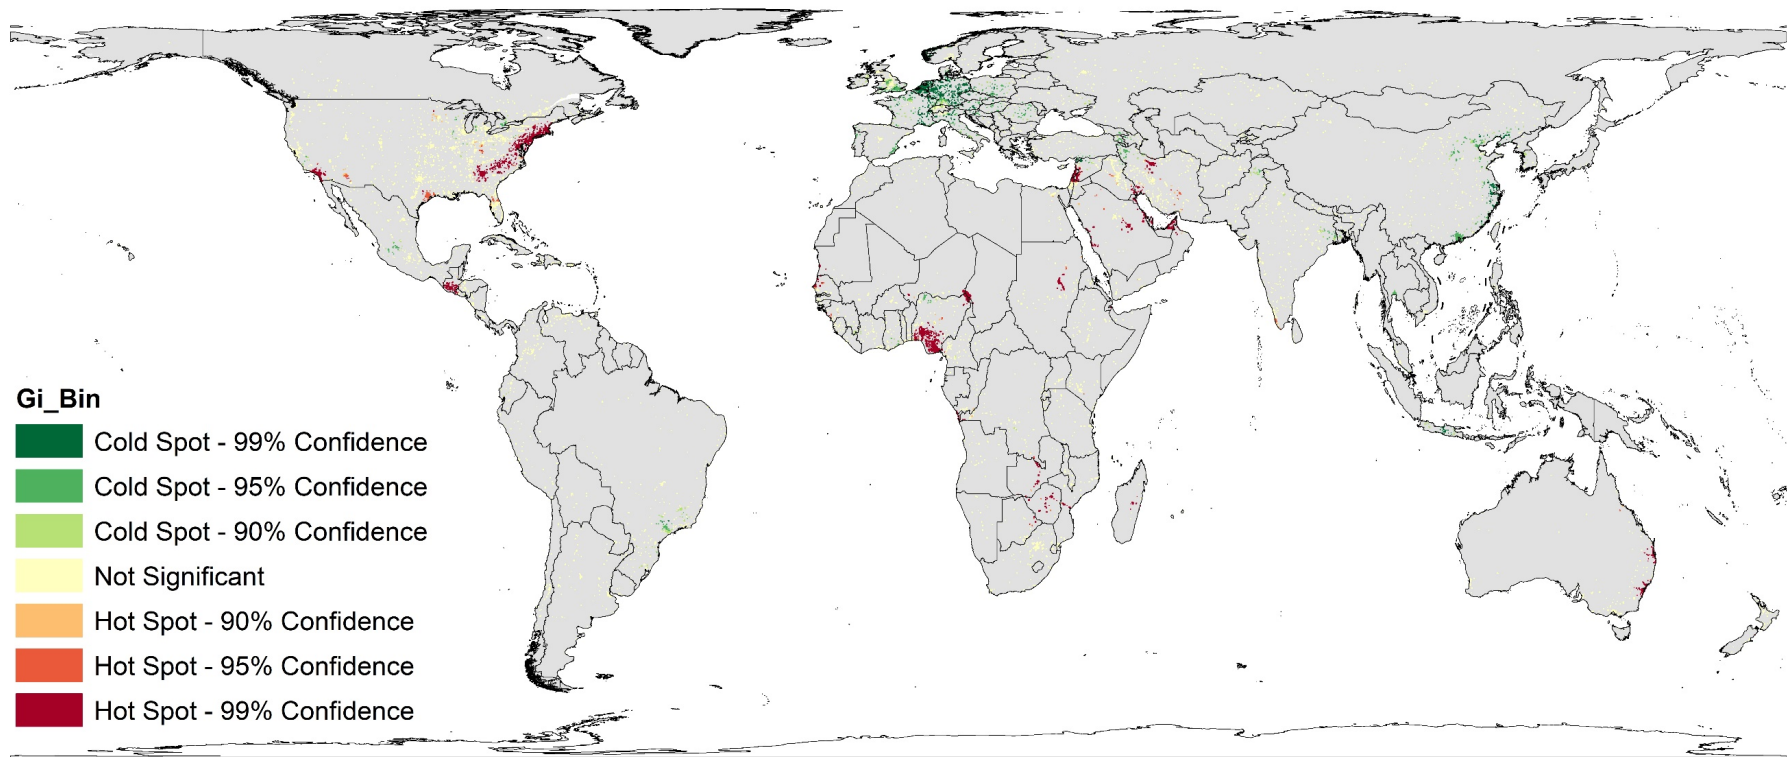

**Supplementary Fig. 5 Future hot-spots and coldspots of habitat loss due to urban expansion under SSP4.** The Hot Spot Analysis (Getis-Ord  $G_i^*$ ) tool in ArcGIS Pro 2.5 was used. This tool identifies statistically significant spatial clusters of high values (hot spots) and low values (cold spots). Potential habitat loss due to future urban expansion was input variable. The  $G_i$ \_Bin identifies statistically significant hot and cold spots. Statistical significance was based on the  $P$ -value and  $Z$ -score (two-sided), and no adjustments were made for multiple comparisons.



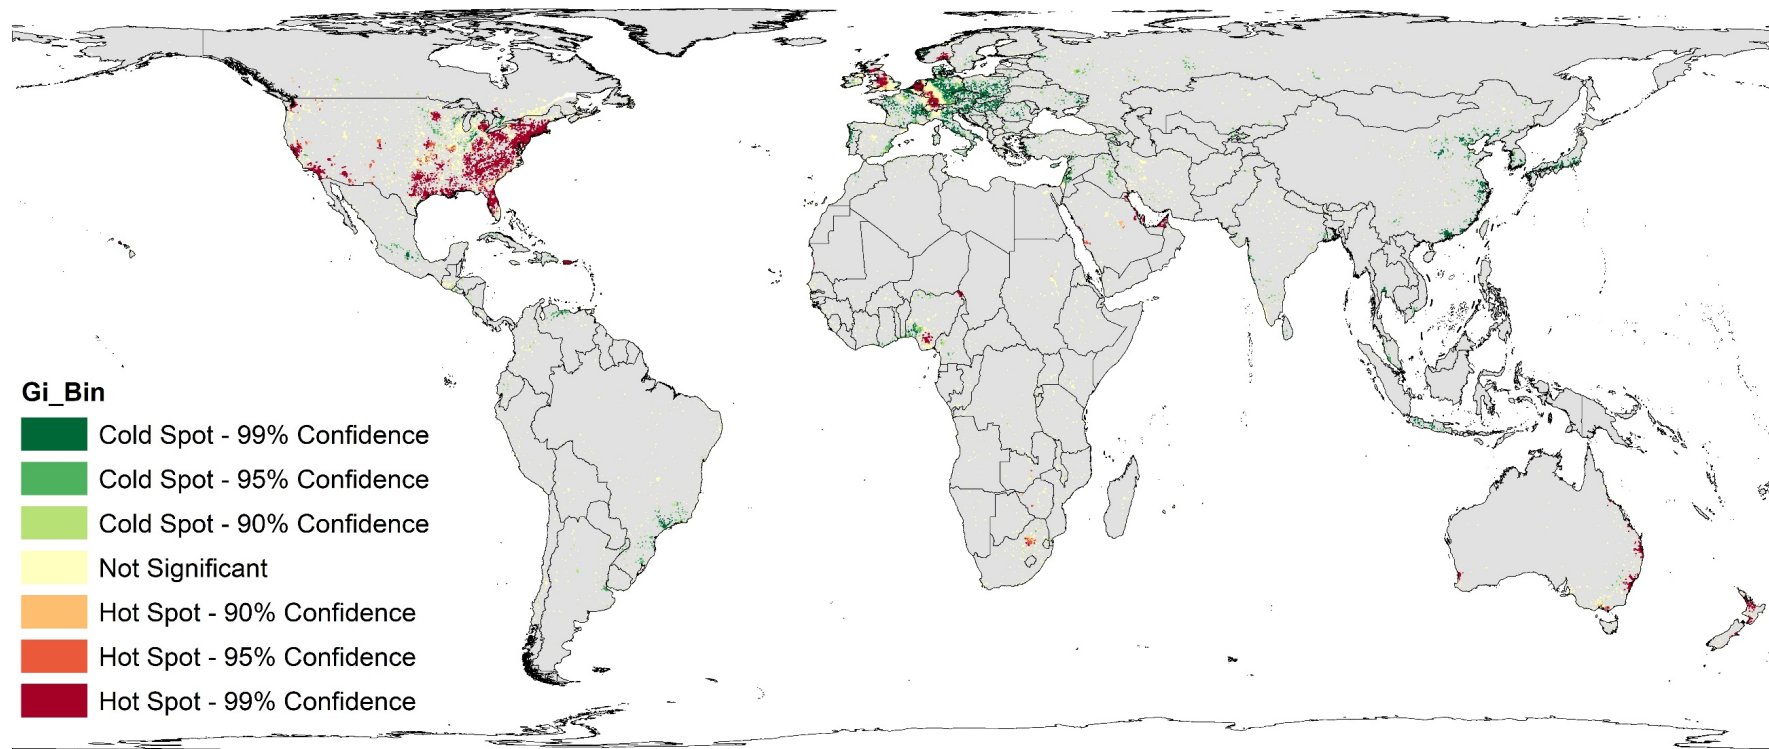

**Supplementary Fig. 6 Future hot-spots and coldspots of habitat loss due to urban expansion under SSP5.** The Hot Spot Analysis (Getis-Ord  $G_i^*$ ) tool in ArcGIS Pro 2.5 was used. This tool identifies statistically significant spatial clusters of high values (hot spots) and low values (cold spots). Potential habitat loss due to future urban expansion was input variable. The  $G_i$ \_Bin identifies statistically significant hot and cold spots. Statistical significance was based on the  $P$ -value and  $Z$ -score (two-sided), and no adjustments were made for multiple comparisons.

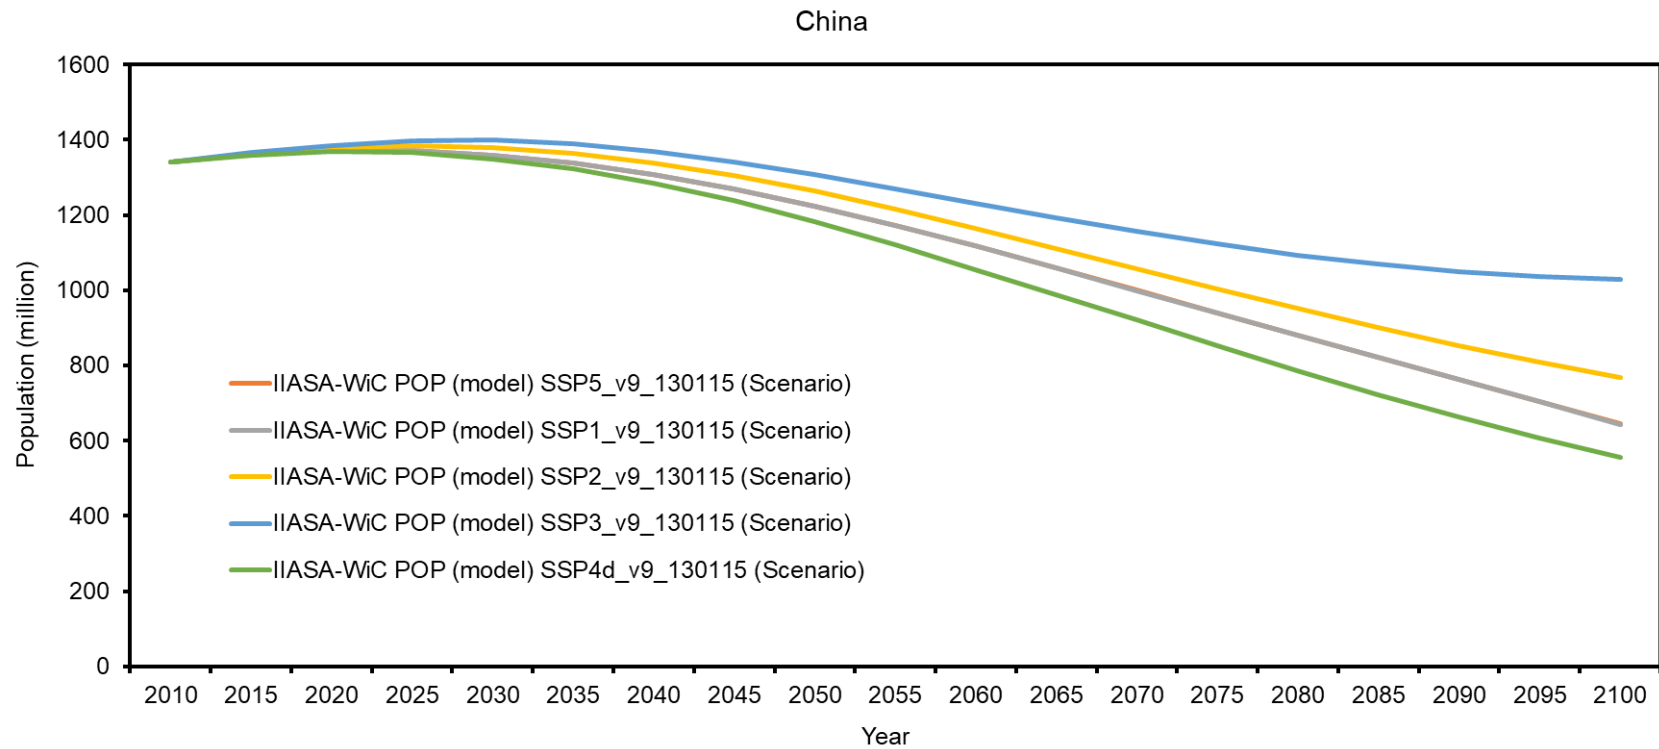

**Supplementary Fig. 7 The changes in total population (in million) in China from 2010 to 2100 based on the SSP Database version 2.0.**



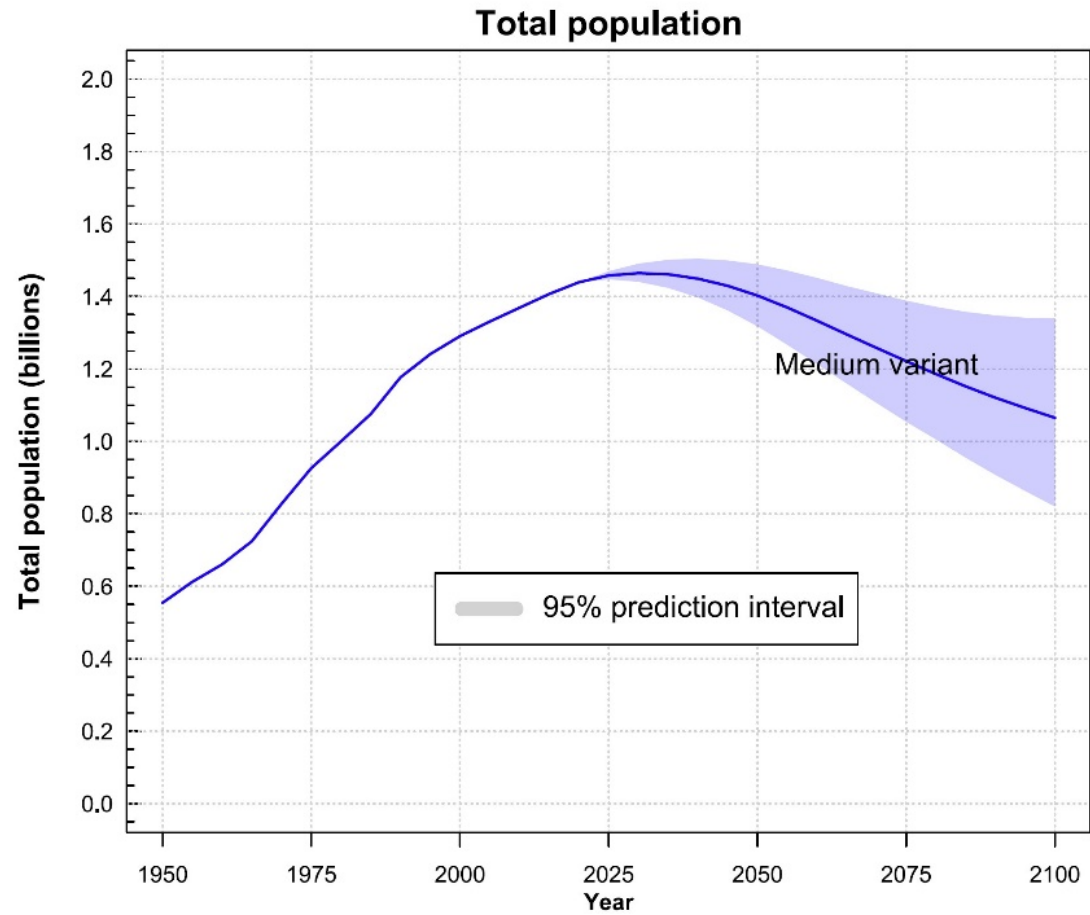

Supplementary Fig. 8 The changes in total population (in billions) in China from 1950 to 2100 based on

**the World Population Prospects 2019, UN.**

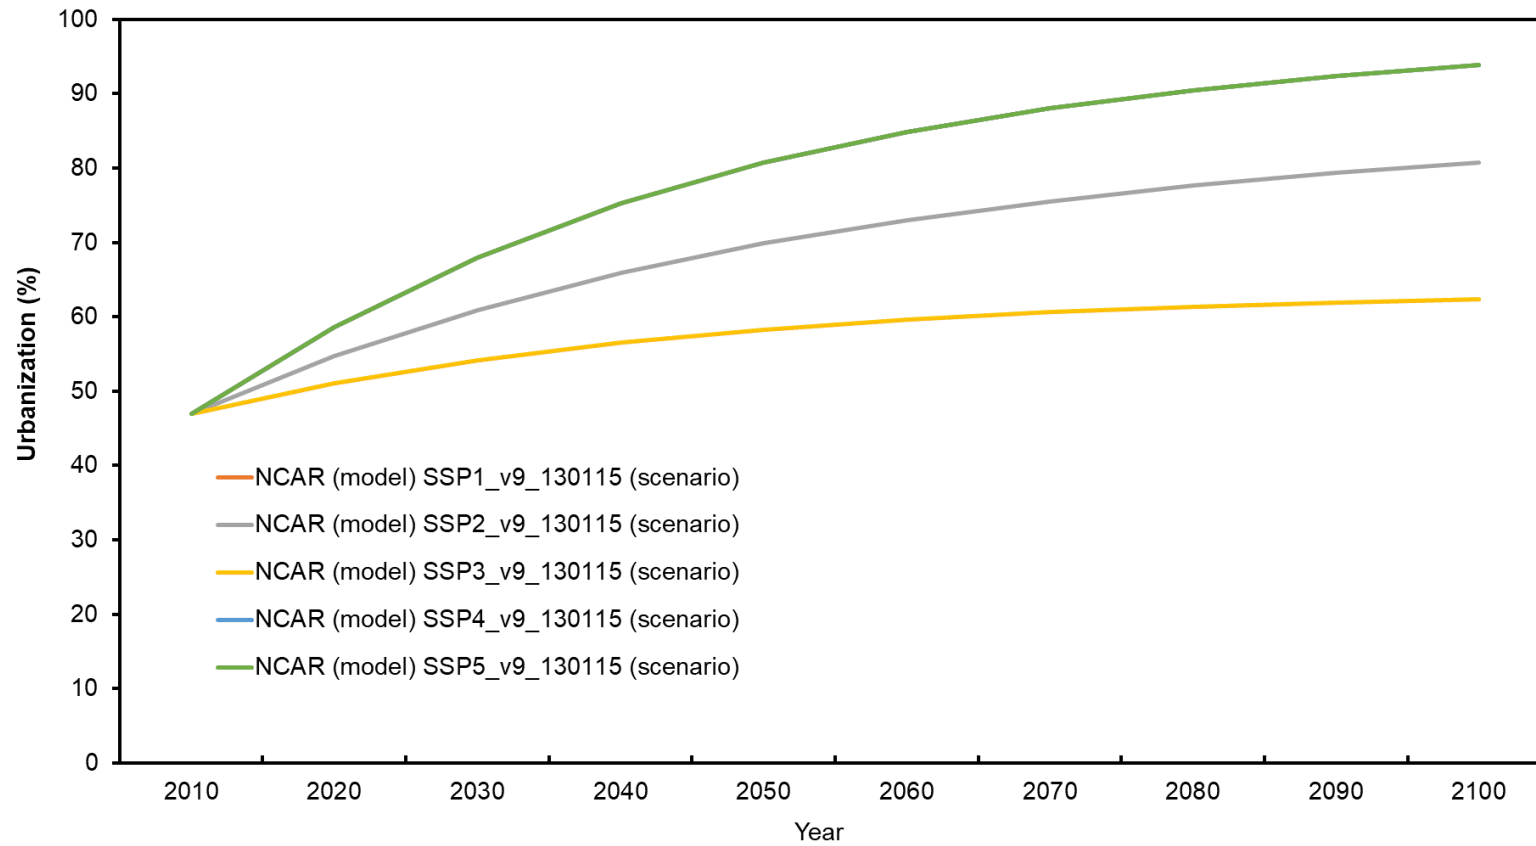

**Supplementary Fig. 9 Future urbanization estimation in China from 2010 to 2100 based on the SSP Database version 2.0.**

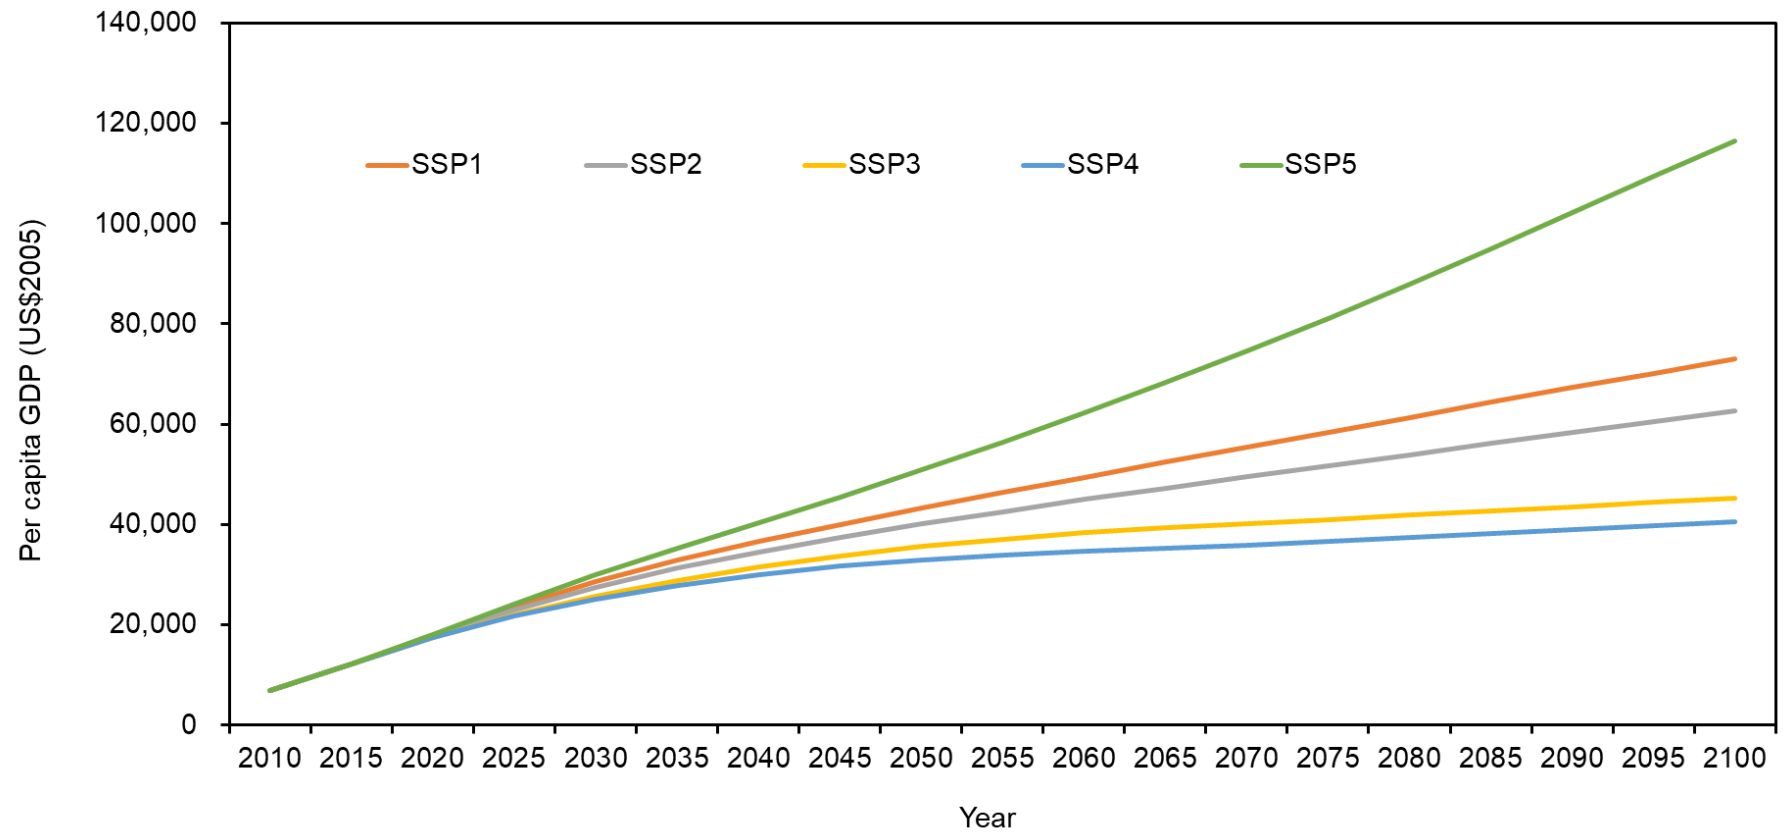

**Supplementary Fig. 10 Future per capita GDP estimation in China from 2010 to 2100 based on the SSP Database version 2.0.**

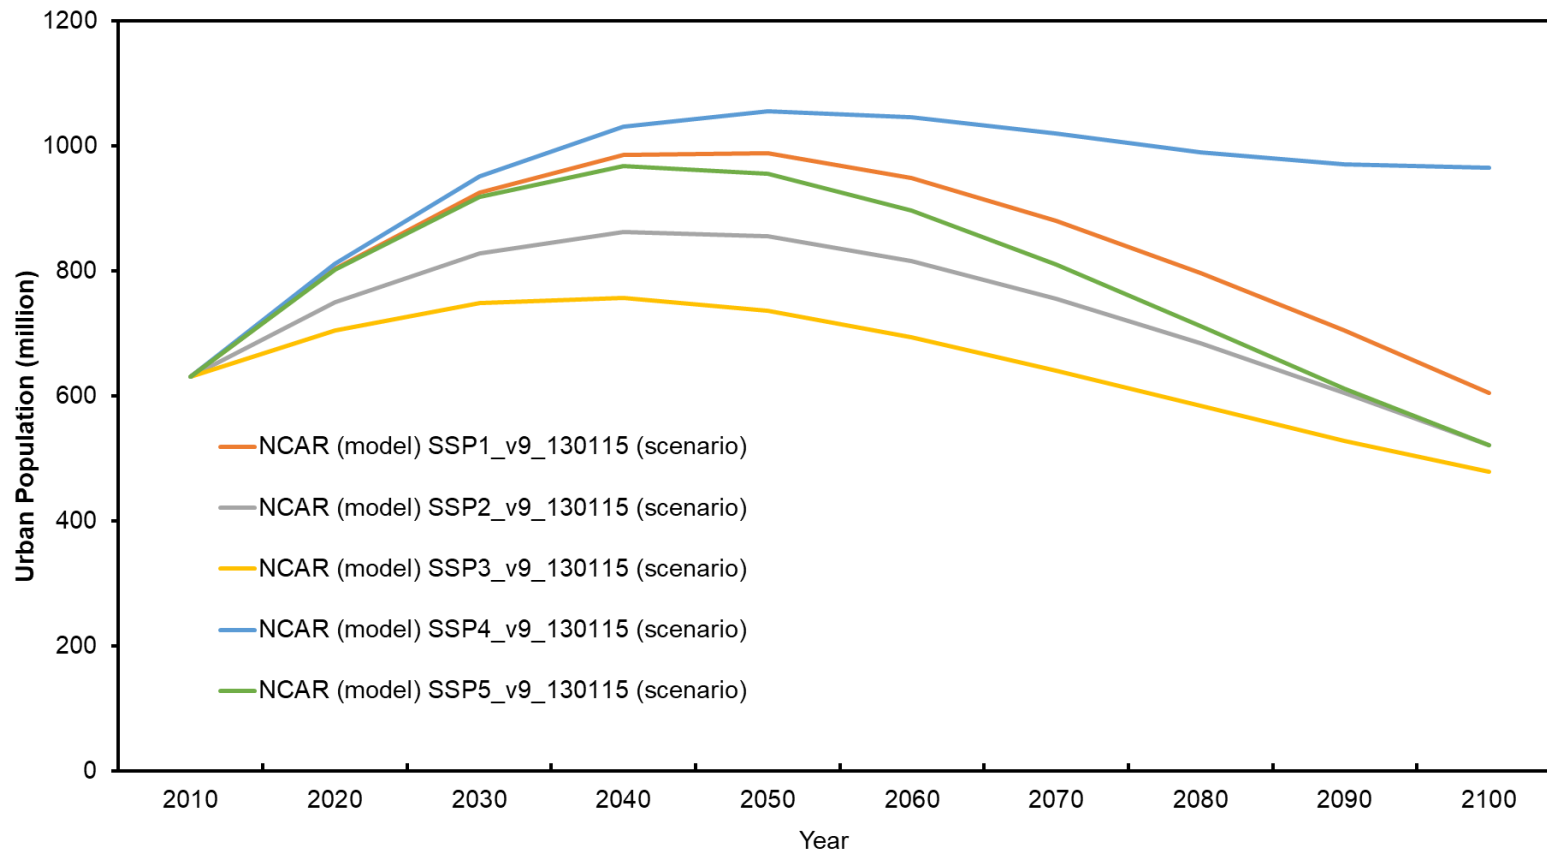

**Supplementary Fig. 11 Future urban population estimation in China from 2010 to 2100 based on the SSP Database version 2.0.**

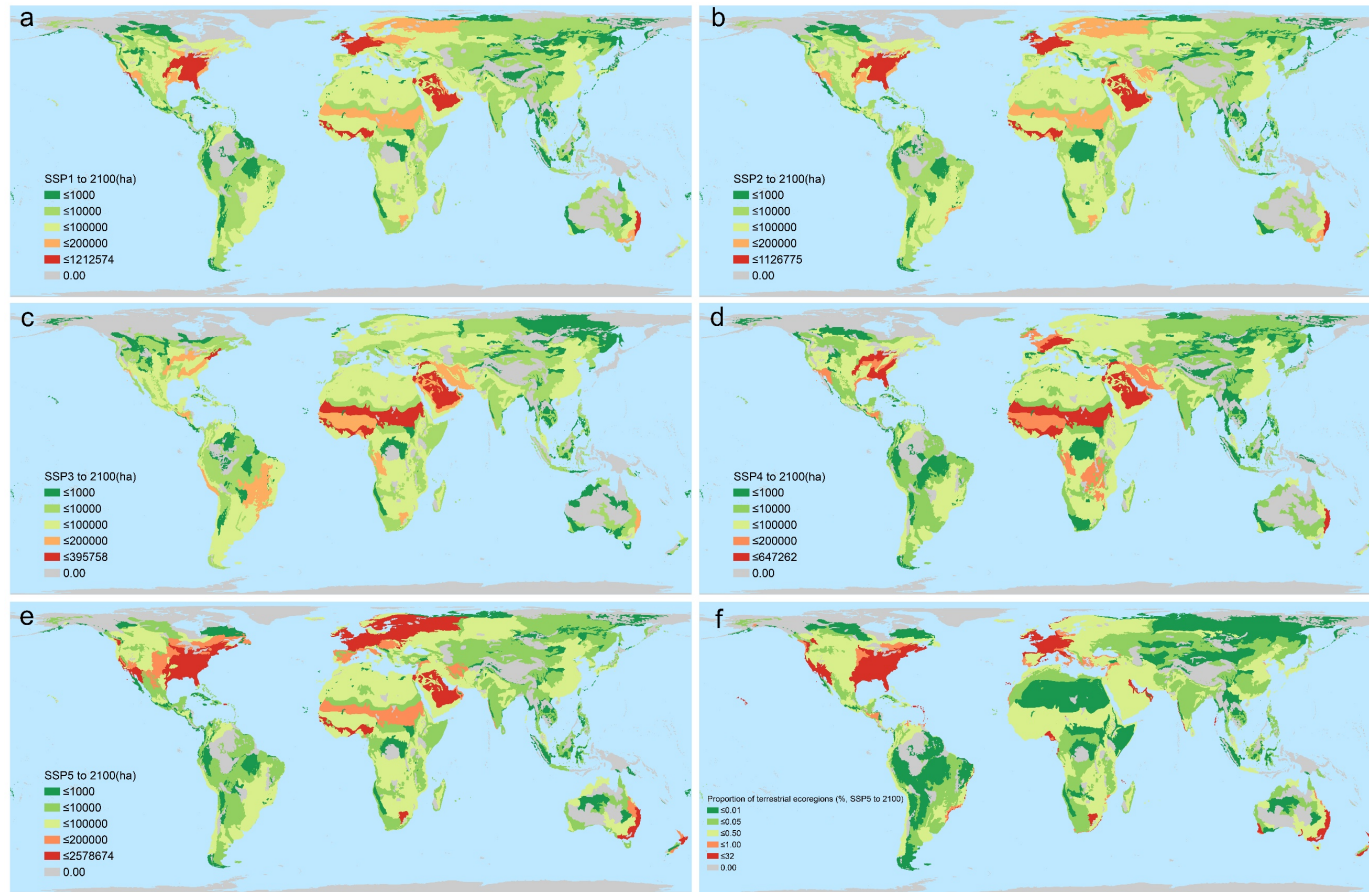

**Supplementary Fig. 12 Future habitat loss due to urban expansion at the ecoregional scale under SSP scenarios by 2100.** (a) the ecoregional statistics of habitat loss area caused by urban expansion under SSP1 scenario; (b) under SSP2 scenario; (c) under SSP3 scenario; (d) under SSP4 scenario; (e) under SSP5 scenario; (f) future habitat loss proportion at the ecoregional level caused by urban expansion under SSP5.

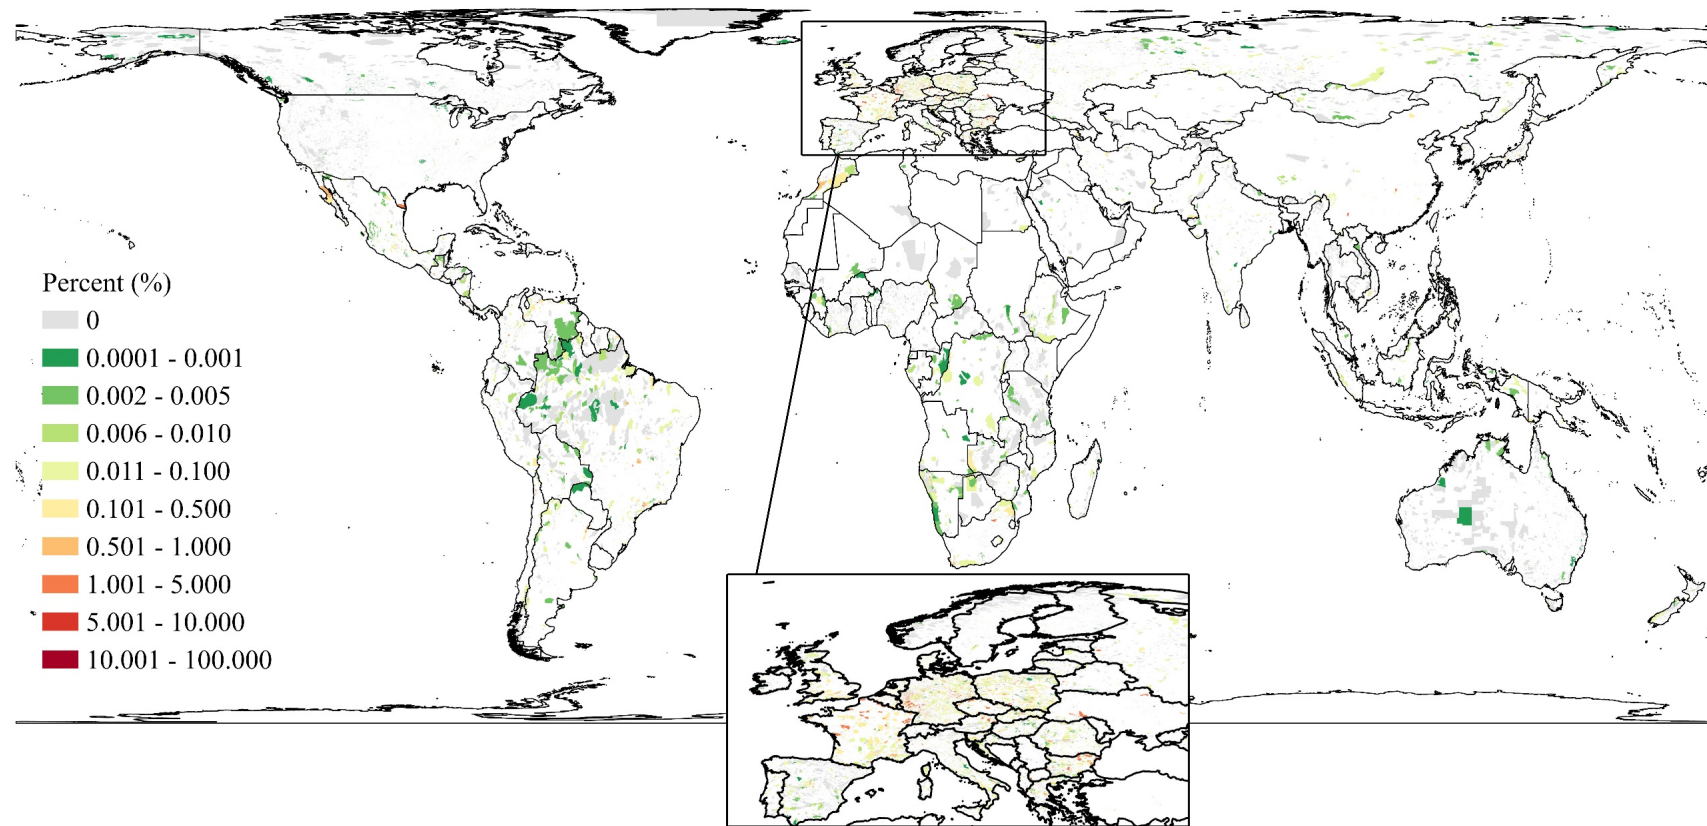

**Supplementary Fig. 13 The percent of urban land within protected areas in 1992.** The urban area within PAs was 8,290 km<sup>2</sup> in 1992. The number of protected areas affected by urban land was 21,217. The number and total area of protected areas with IUCN categories I and II were 558 and 579.31 km<sup>2</sup>, respectively. These results were based on global LC 1992 map produced by the European Space Agency (ESA) Climate Change Initiative (CCI) with a resolution of 300 meters.



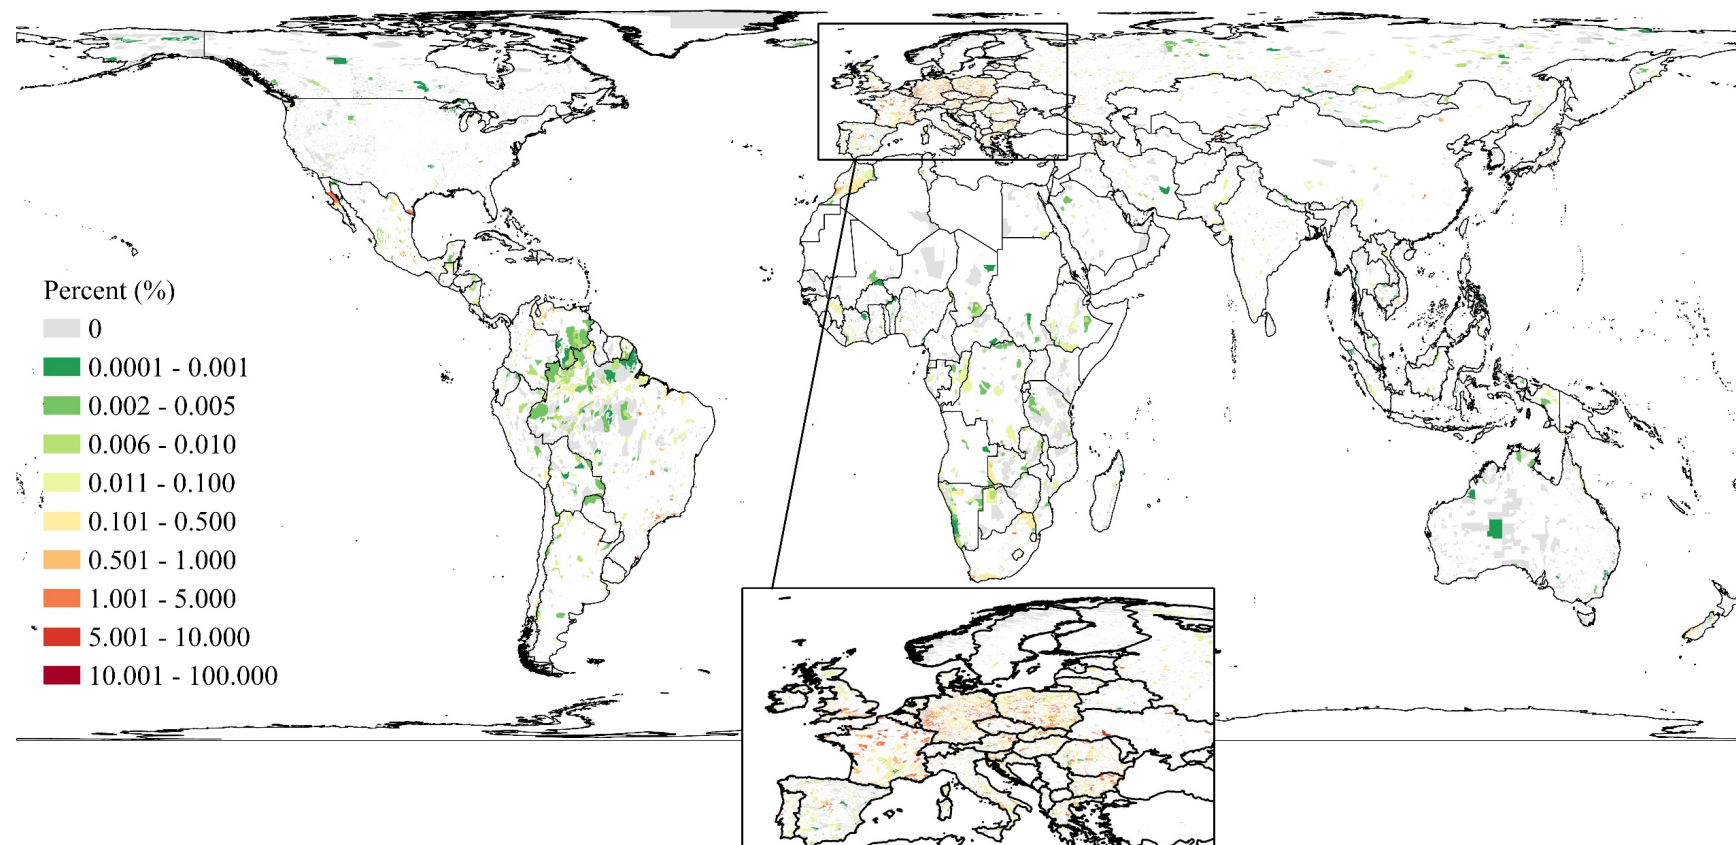

**Supplementary Fig. 14 The percent of urban land within protected areas in 2015.** The urban area within PAs was 20,625 km<sup>2</sup> in 2015. The number of protected areas affected by urban land was 35,161. The number and total area of protected areas with IUCN categories I and II were 813 and 1229.95 km<sup>2</sup>, respectively. These results were based on global LC 2015 map produced by the European Space Agency (ESA) Climate Change Initiative (CCI) with a resolution of 300 meters.

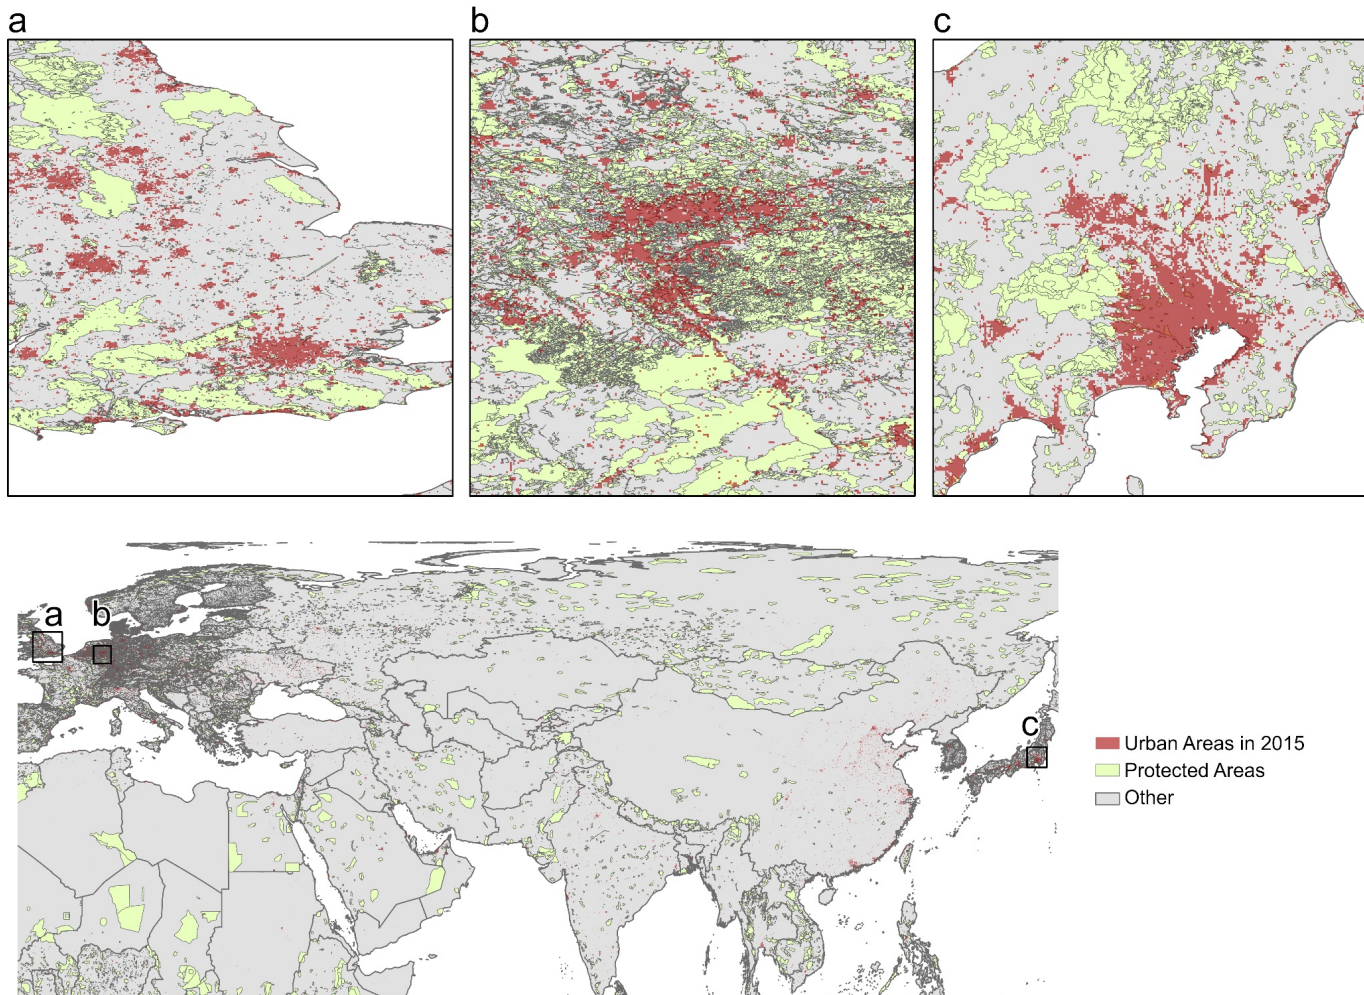

**Supplementary Fig. 15 Urban areas that were distributed in protected areas in 2015.**



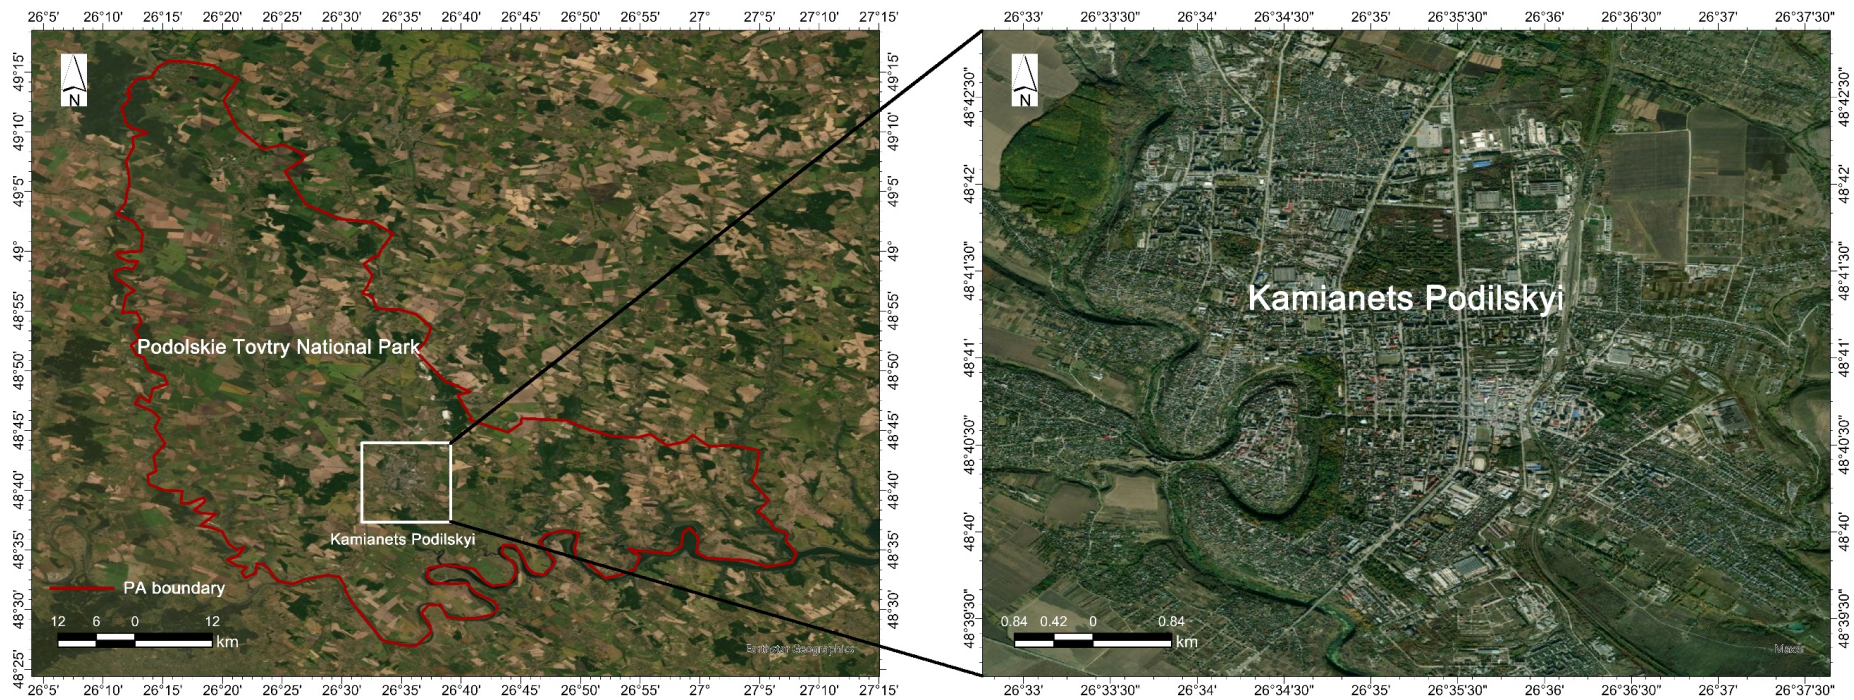

**Supplementary Fig. 16 Kamianets-Podilskyi, a city within Podolskie Tovtry National Park, Ukraine.**

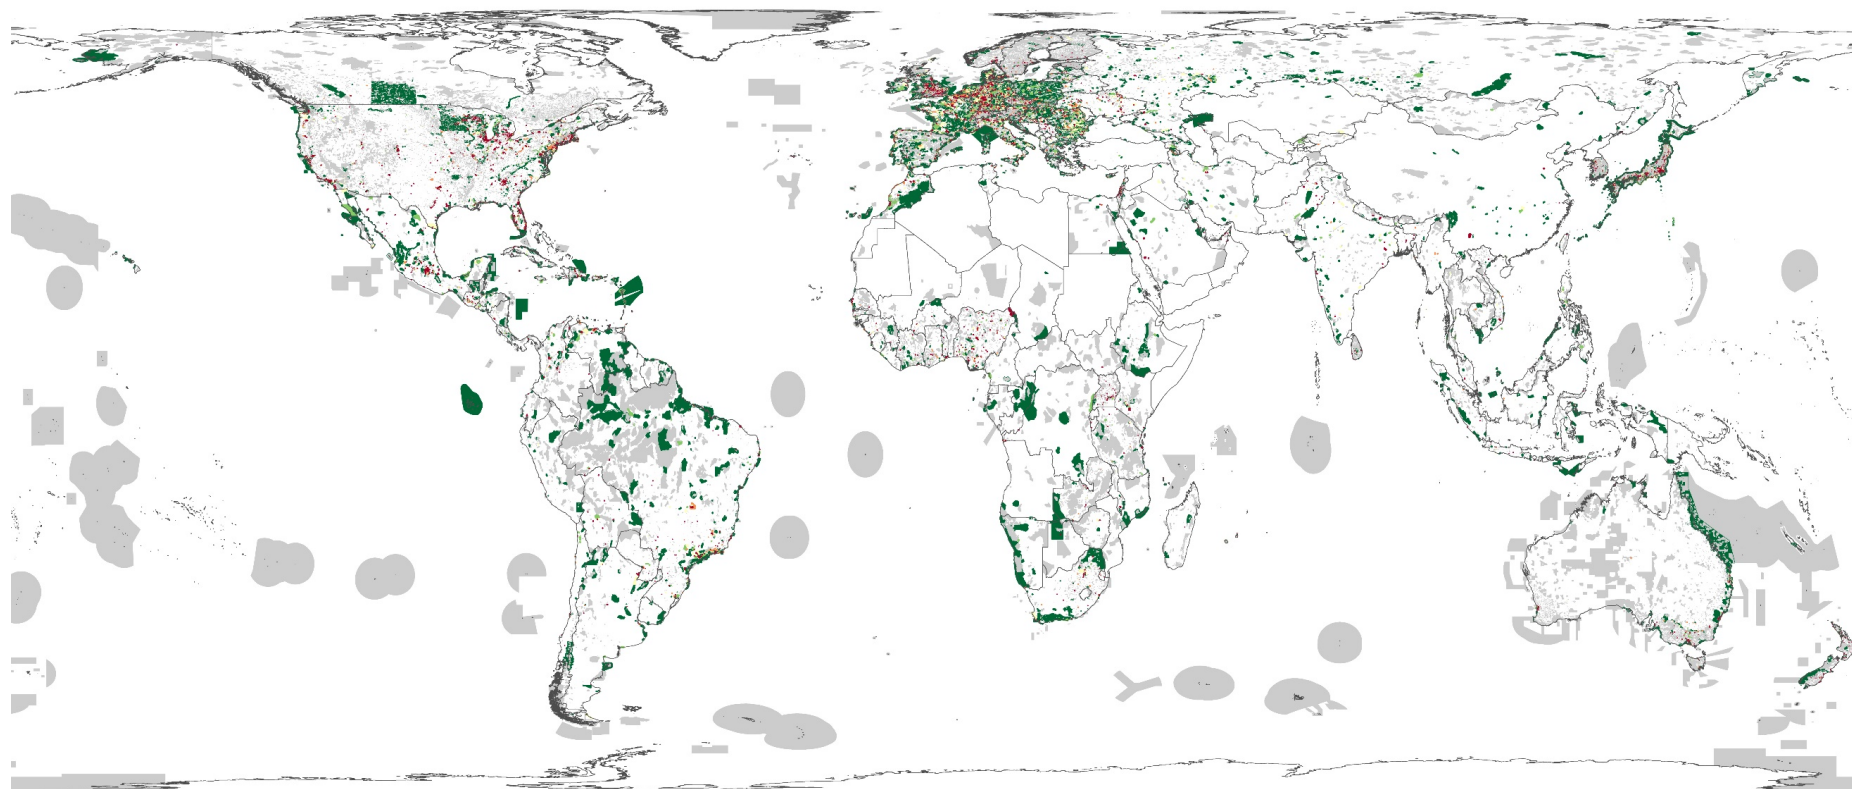

PERCENTAGE

≤1.00

≤2.00

≤5.00

≤10.00

≤100.00

Nodata

**Supplementary Fig. 17 The proportion of urban land in each protected area by 2100 under SSP3 scenario.**



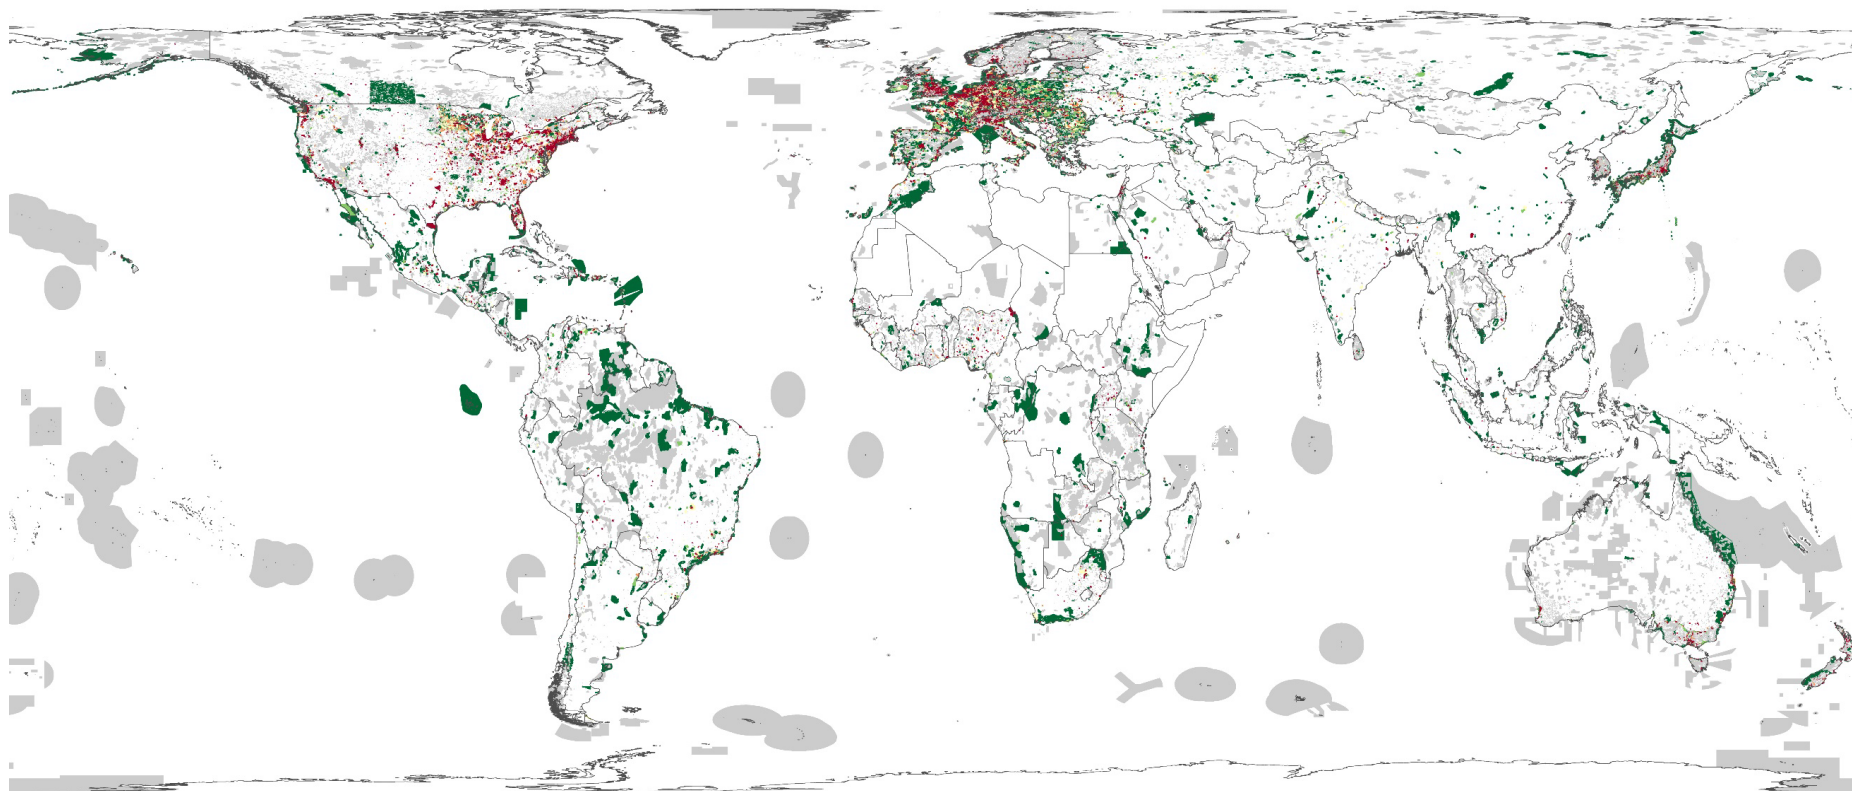

PERCENTAGE

≤1.00

≤2.00

≤5.00

≤10.00

≤100.00

Nodata

**Supplementary Fig. 18 The proportion of urban land in each protected area by 2100 under SSP5 scenario.**

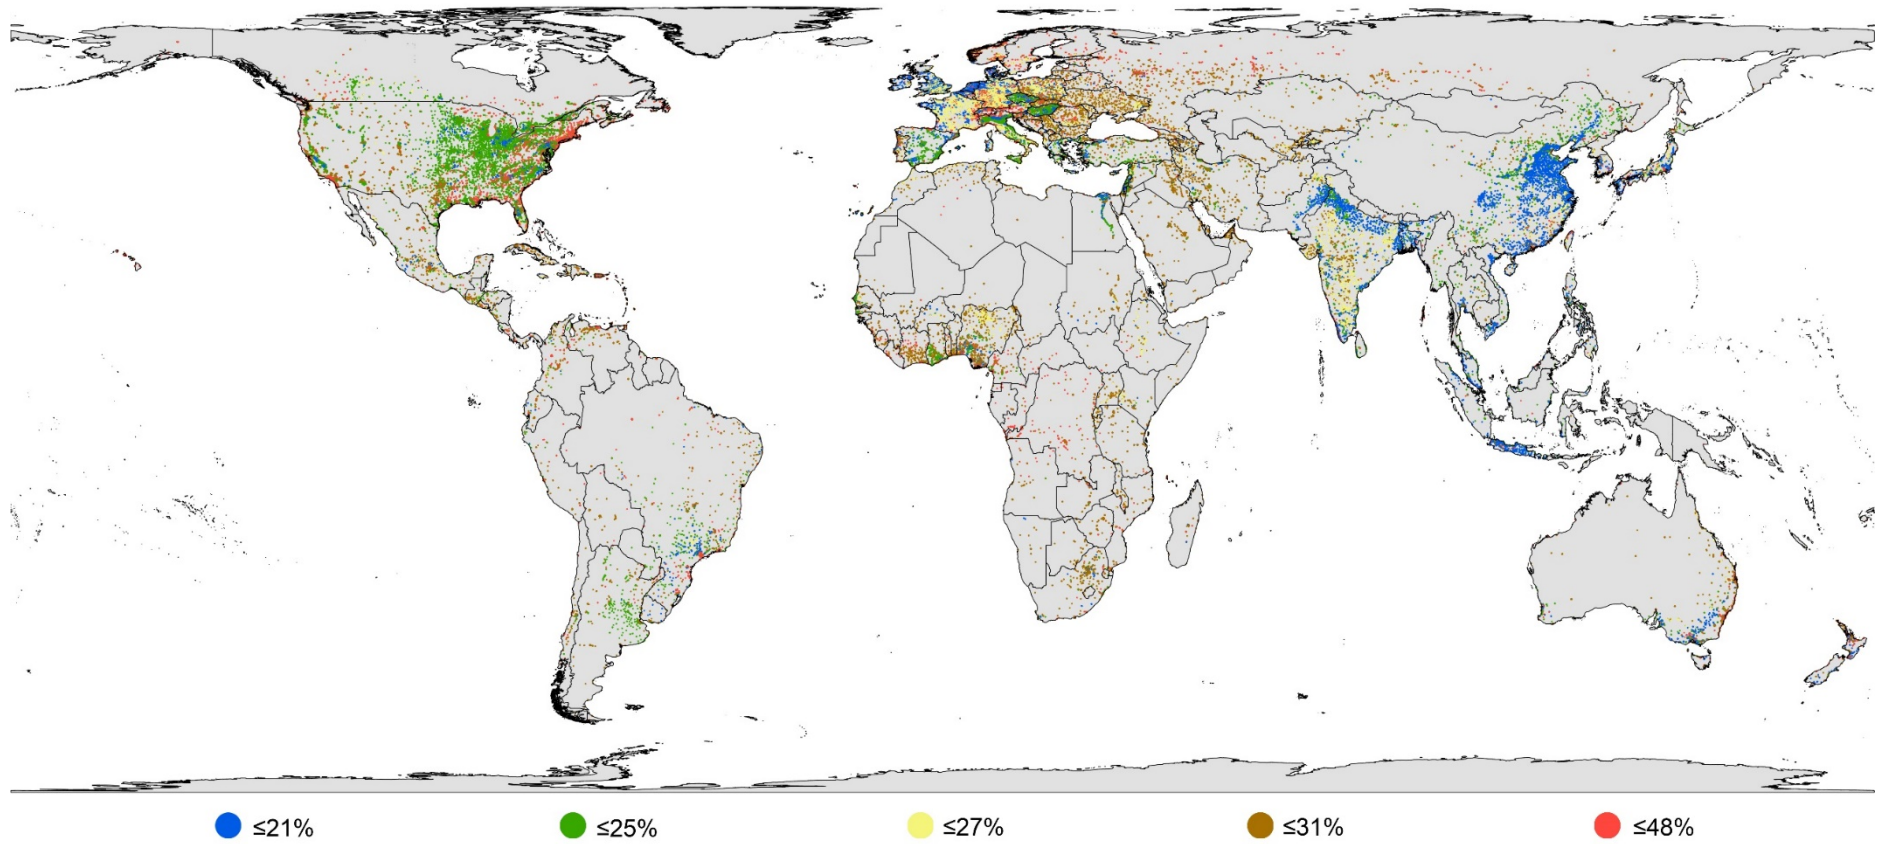

**Supplementary Fig. 19 Future overall relative species richness losses due to urban expansion under SSP5 scenario in 1-km grid.**

All Amphibians, Mammals and Birds

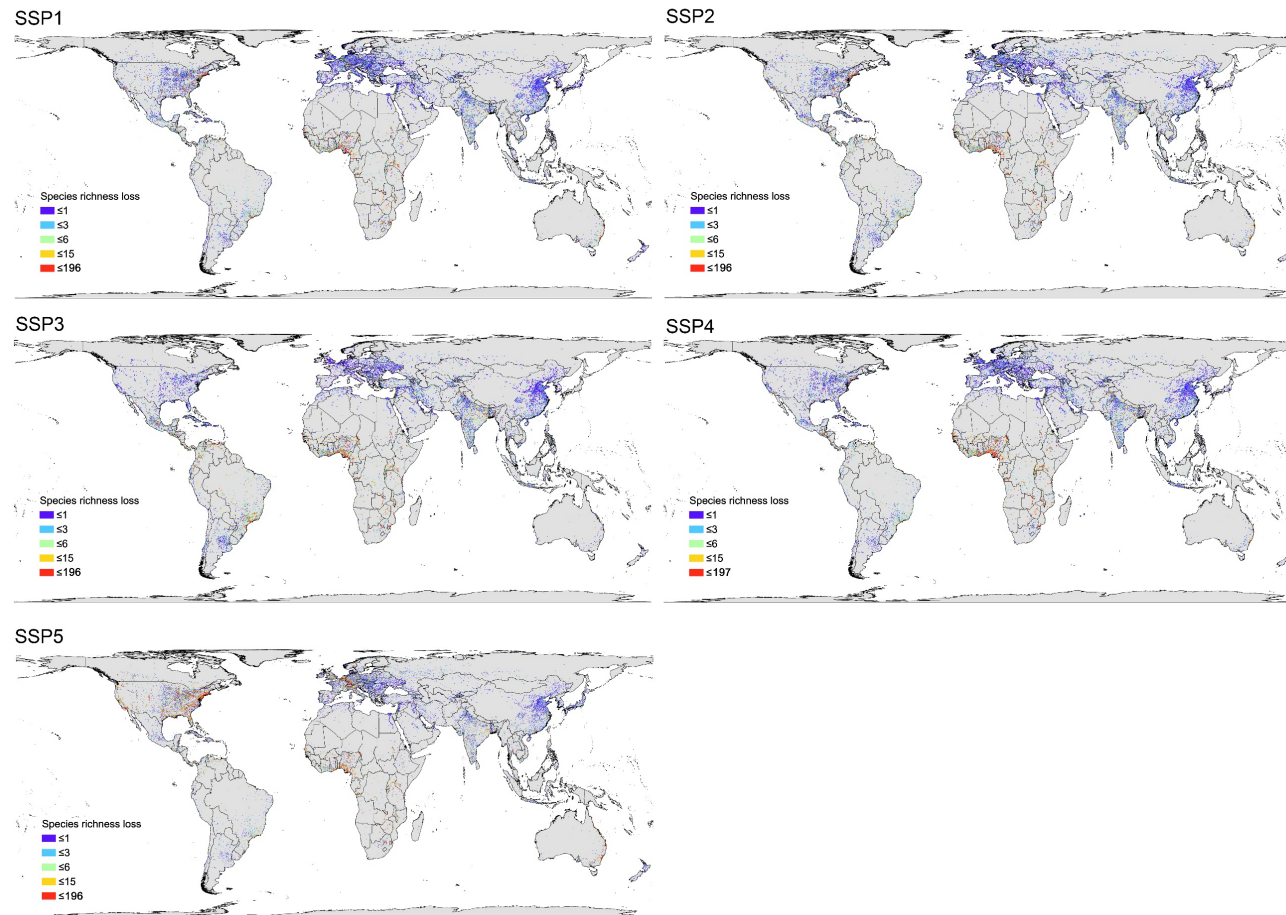

**Supplementary Fig. 20 Future potential species richness loss of all amphibians, mammals and birds due to urban expansion under SSP scenarios in 10-km grid.**

Threatened Amphibians, Mammals and Birds

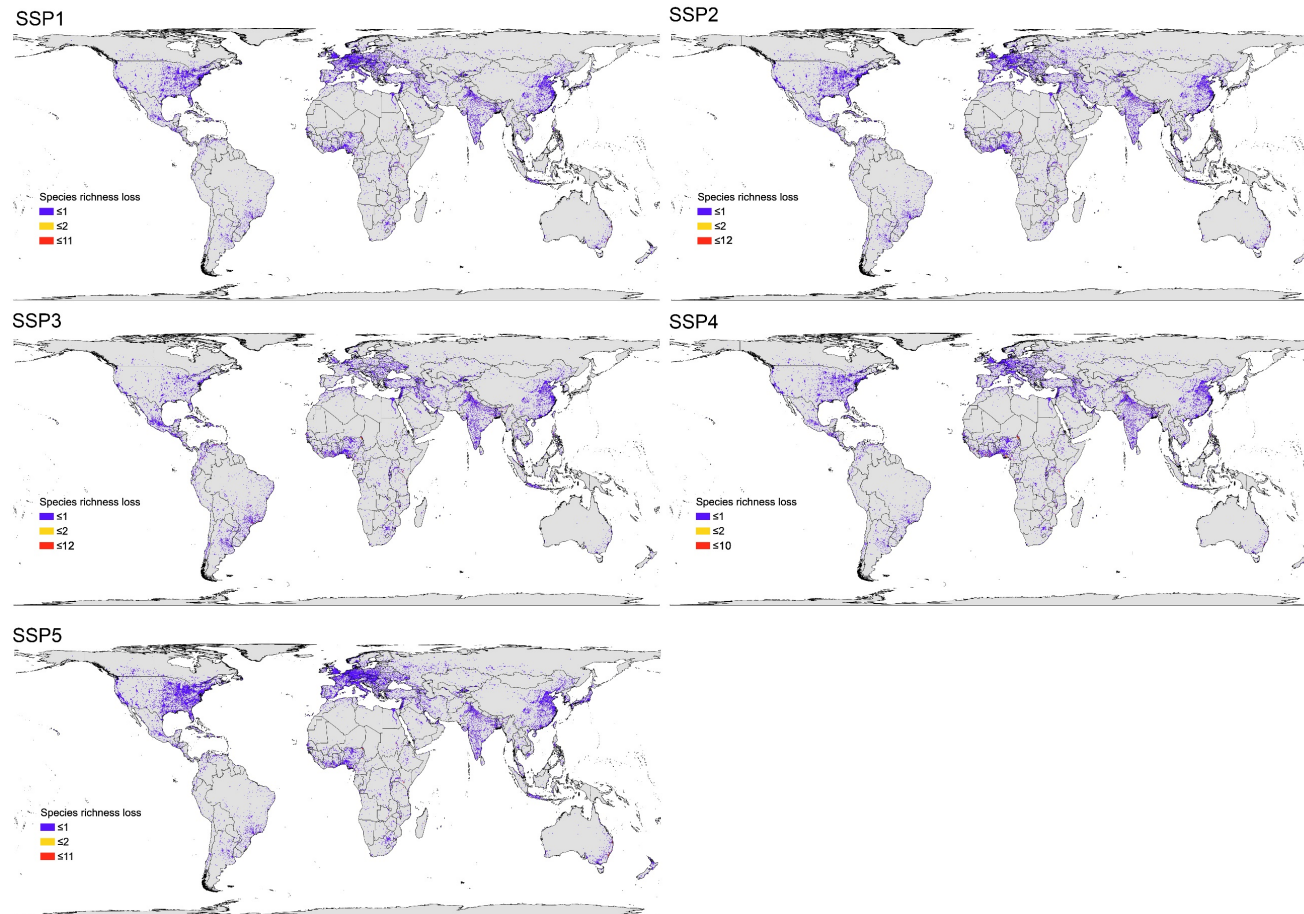

**Supplementary Fig. 21 Future potential species richness loss of threatened amphibians, mammals and birds due to urban expansion under SSP scenarios in 10-km grid.**



Small-ranged Amphibians, Mammals and Birds

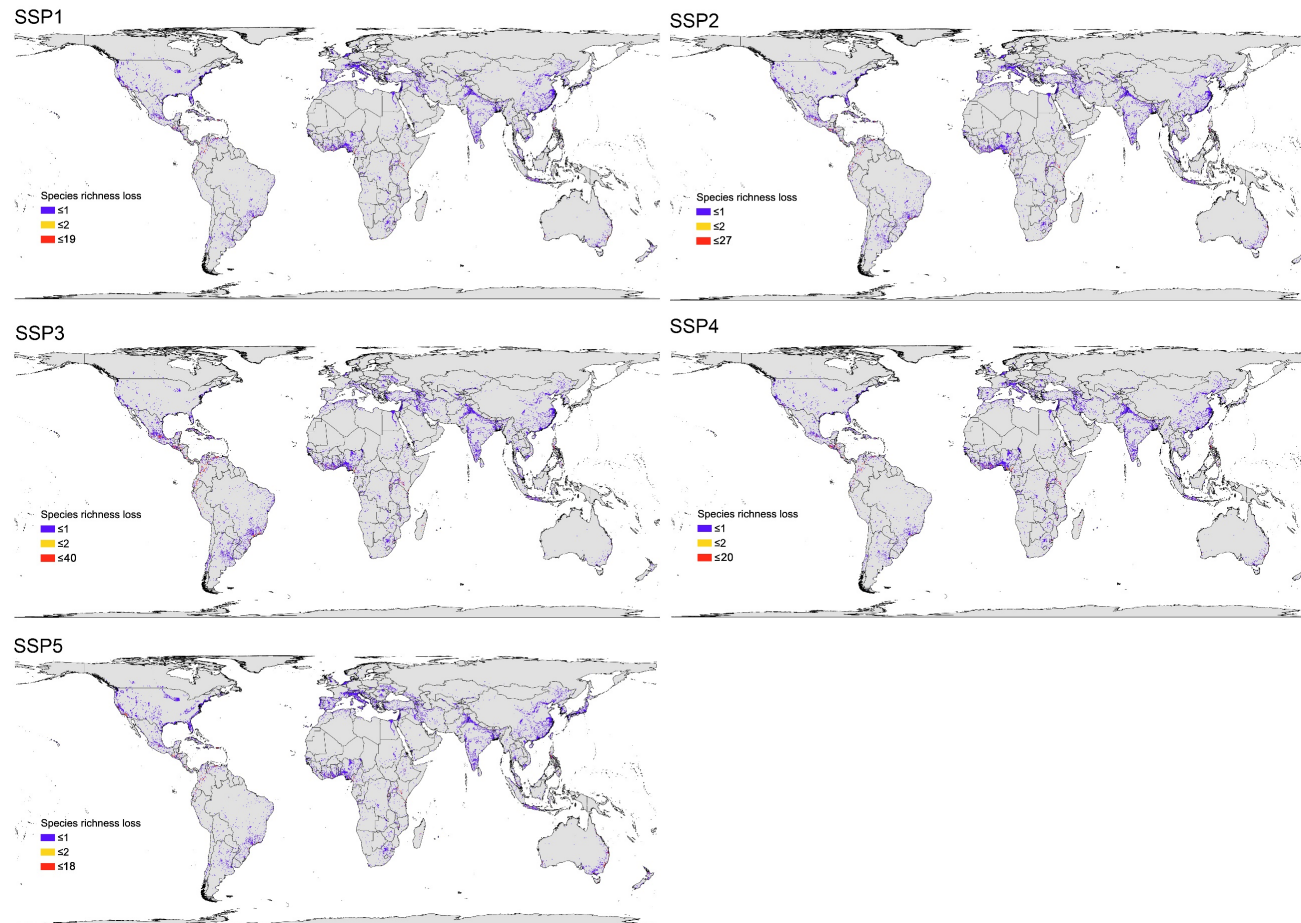

**Supplementary Fig. 22 Future potential species richness loss of small-ranged amphibians, mammals and birds due to urban expansion under SSP scenarios in 10-km grid.**

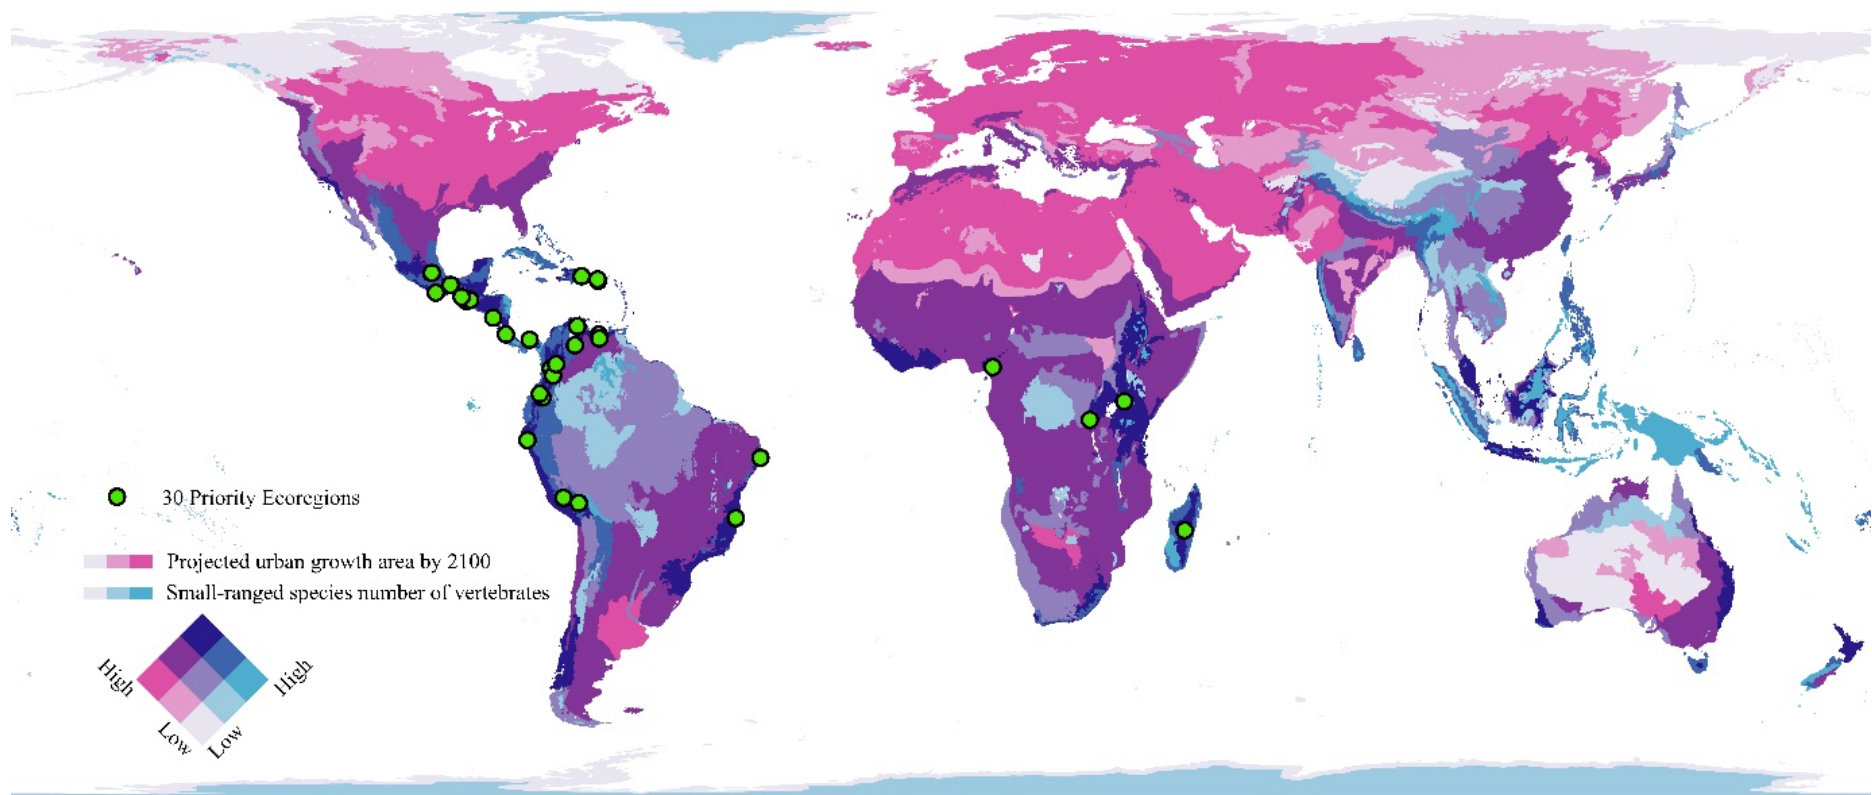

**Supplementary Fig. 23 Conservation-priority ecoregions for species loss caused by future urban growth (mean of five SSPs).**



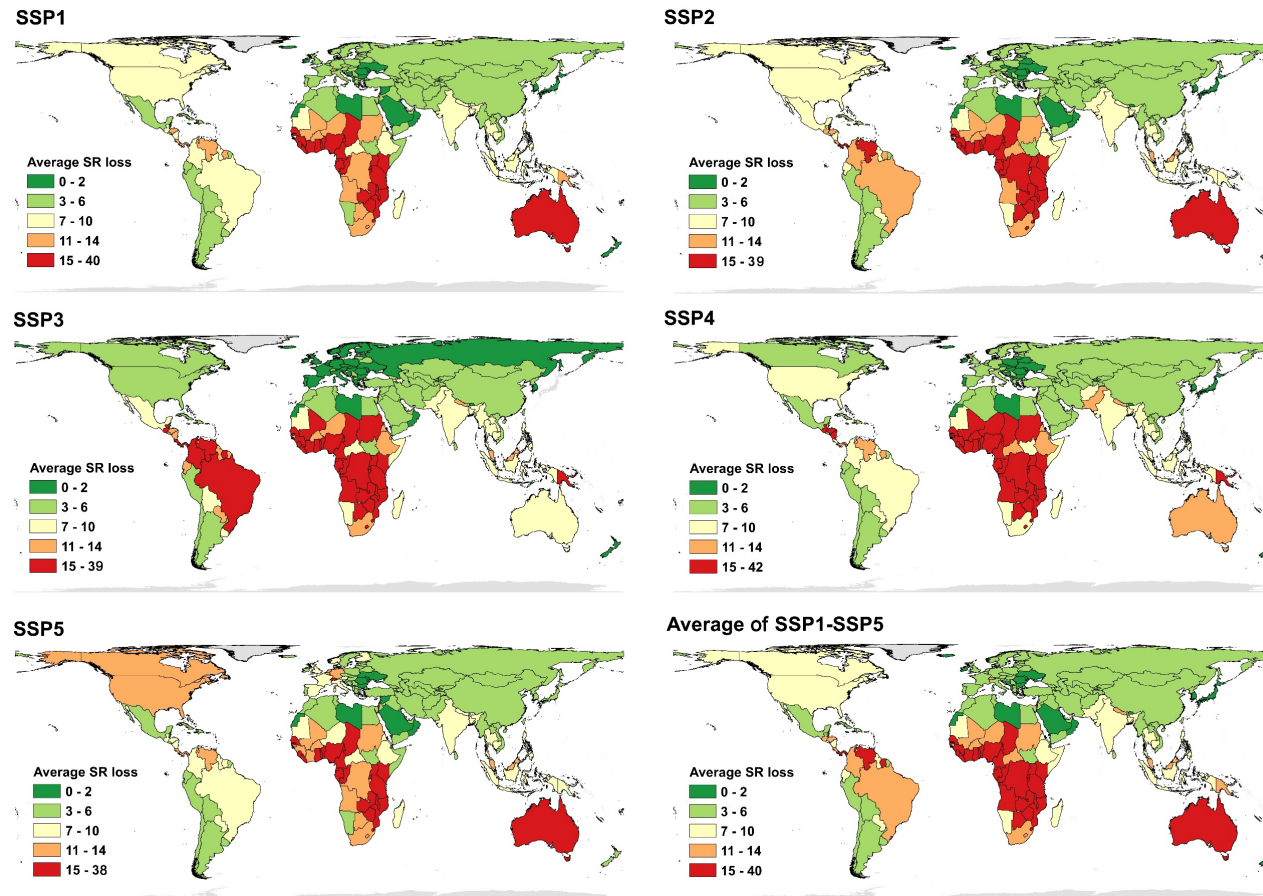

**Supplementary Fig. 24 National average potential biodiversity loss per 10-km grid cell due to future urban expansion under SSP scenarios.** The national mean potential biodiversity loss in terms of average number of terrestrial vertebrate species (amphibians, mammals, and birds) lost per 10-km grid cell. SR= Species Richness. Gray areas were not considered in this analysis.

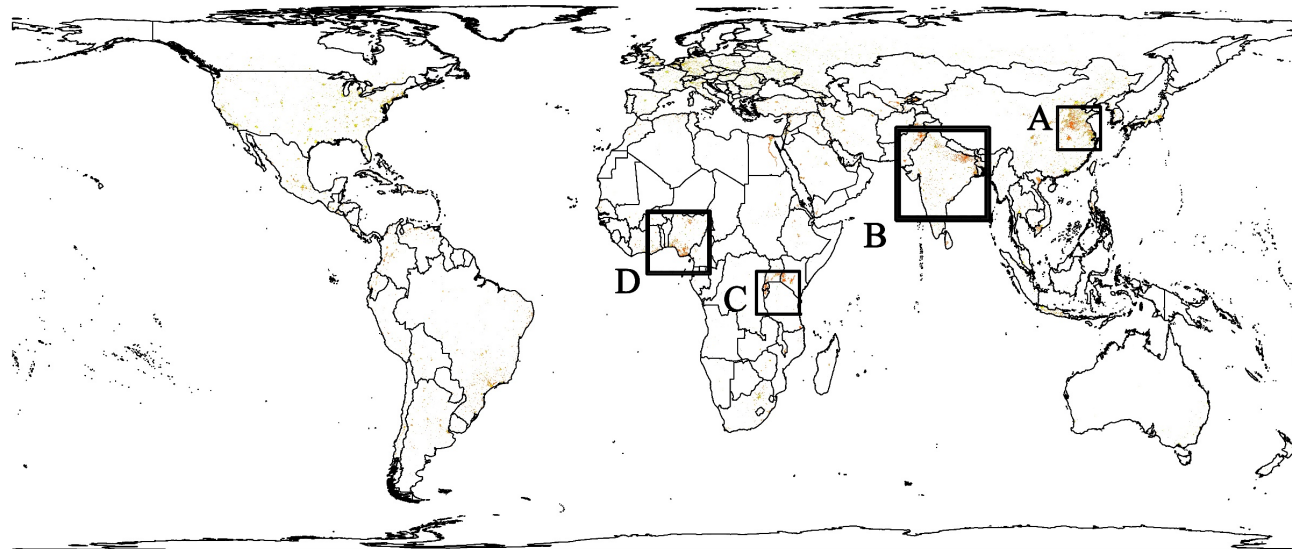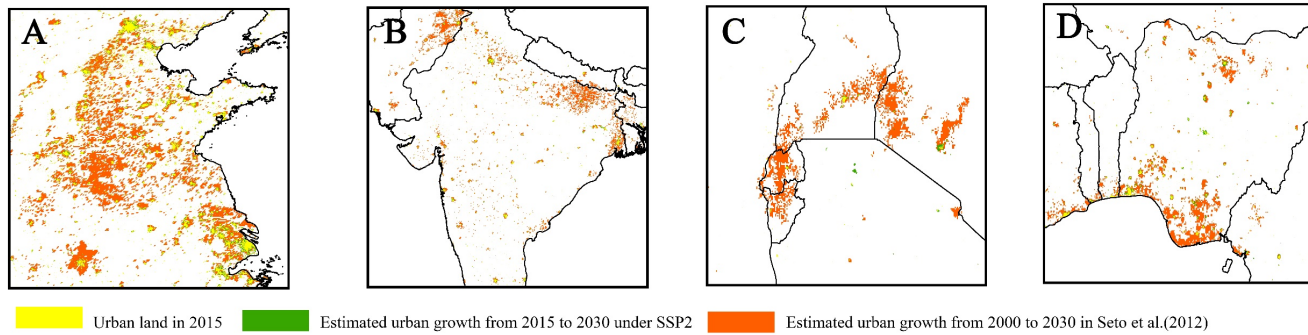

**Supplementary Fig. 25 Global comparison between urban expansion forecasts of Seto et al. (2012) and our projection results under SSP2 (based on Chen et al., 2020). (A) China, (B) India, (C) East Africa, and (D) West Africa.**

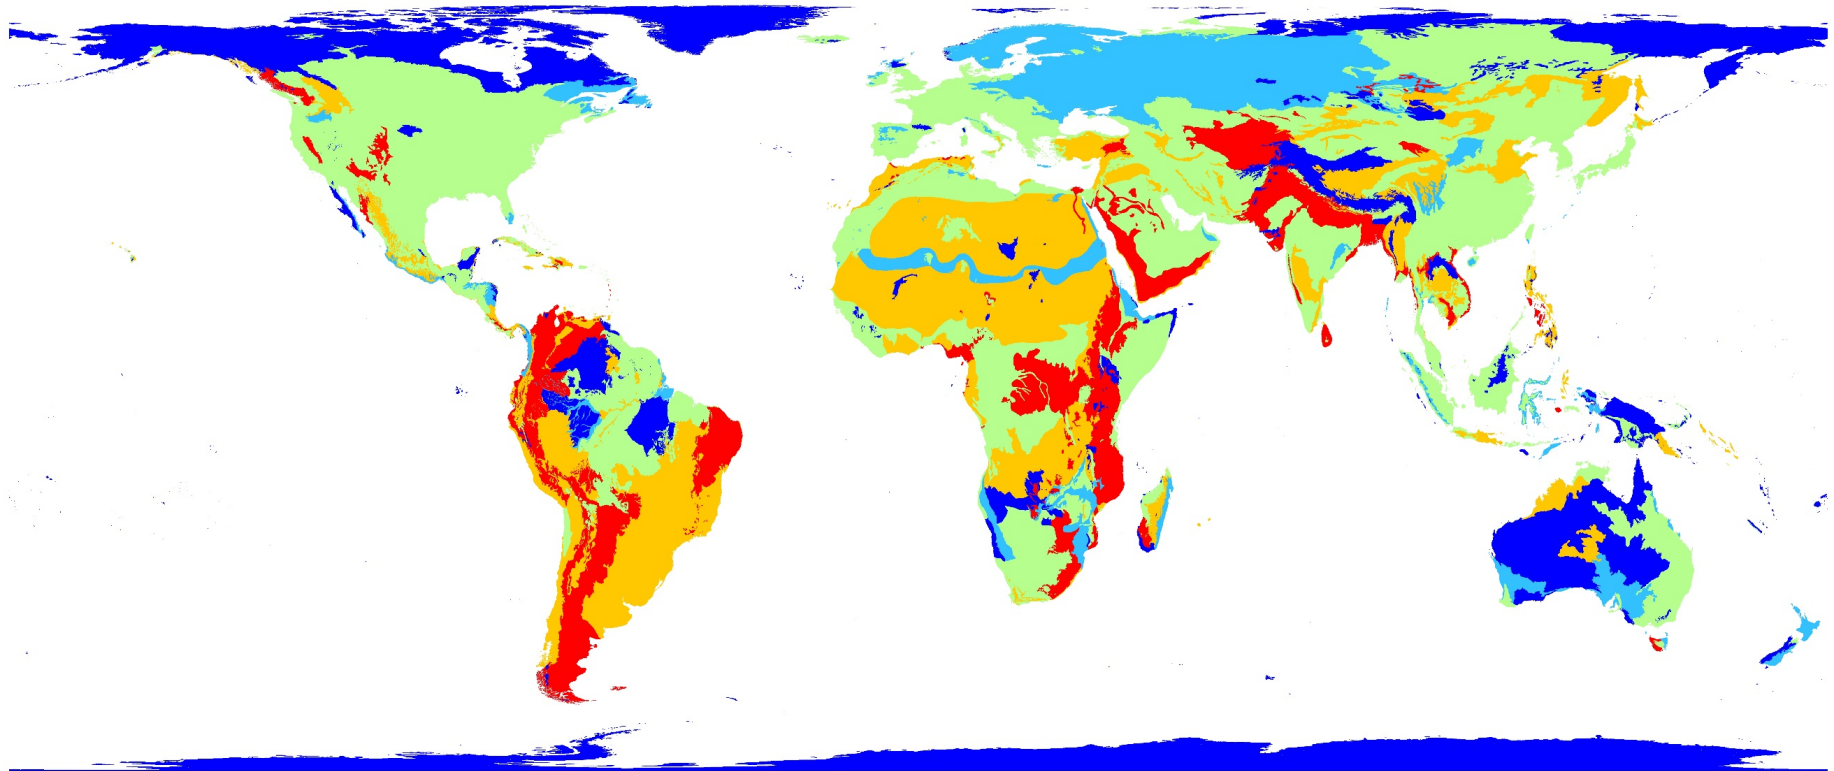

**Difference ratio** ■ 0.00 ■ 0.01 - 1.00 ■ 1.01 - 3.00 ■ 3.01 - 5.00 ■ 5.01 - 75.00

Forecasts of urban expansion to 2030 (Seto et al. 2012)/Our forecasts of urban expansion to 2030 under SSP2

**Supplementary Fig. 26 Difference ratio of urban expansion forecasts between Seto et al. 2012 and our SSP2 projection results (based on Chen et al., 2020).**

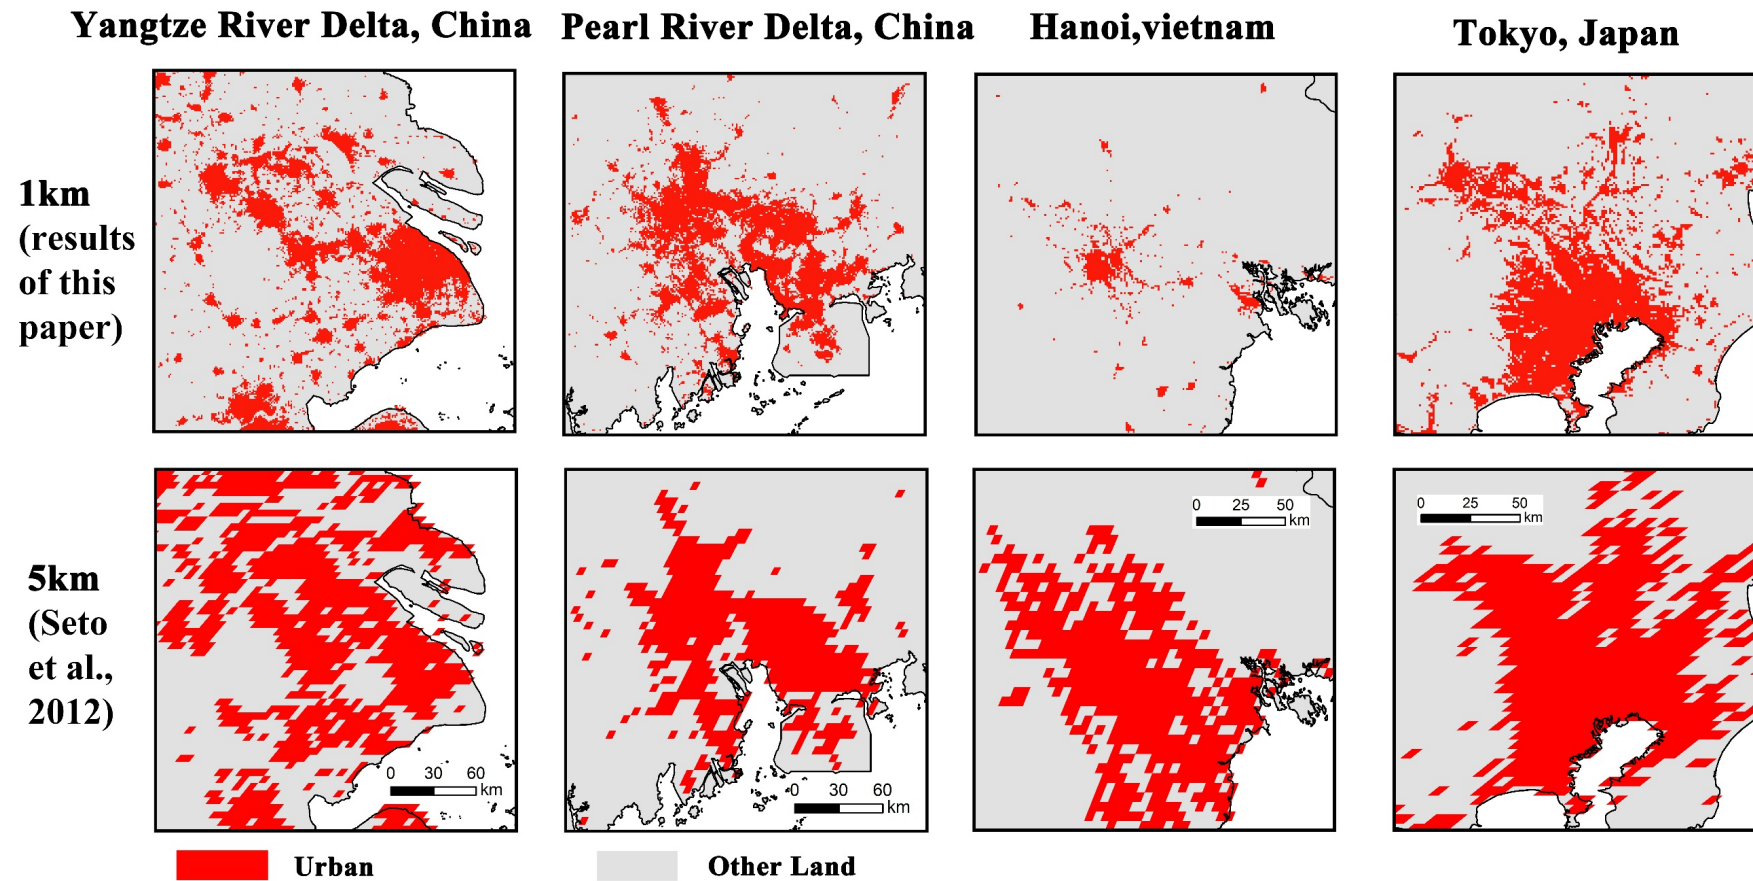

Supplementary Fig. 27 Differences in urban details for some metropolitan areas around the world for the year 2030 using 1-km resolution (our results based on Chen et al., 2020) and 5-km resolution (Seto et al., 2012).



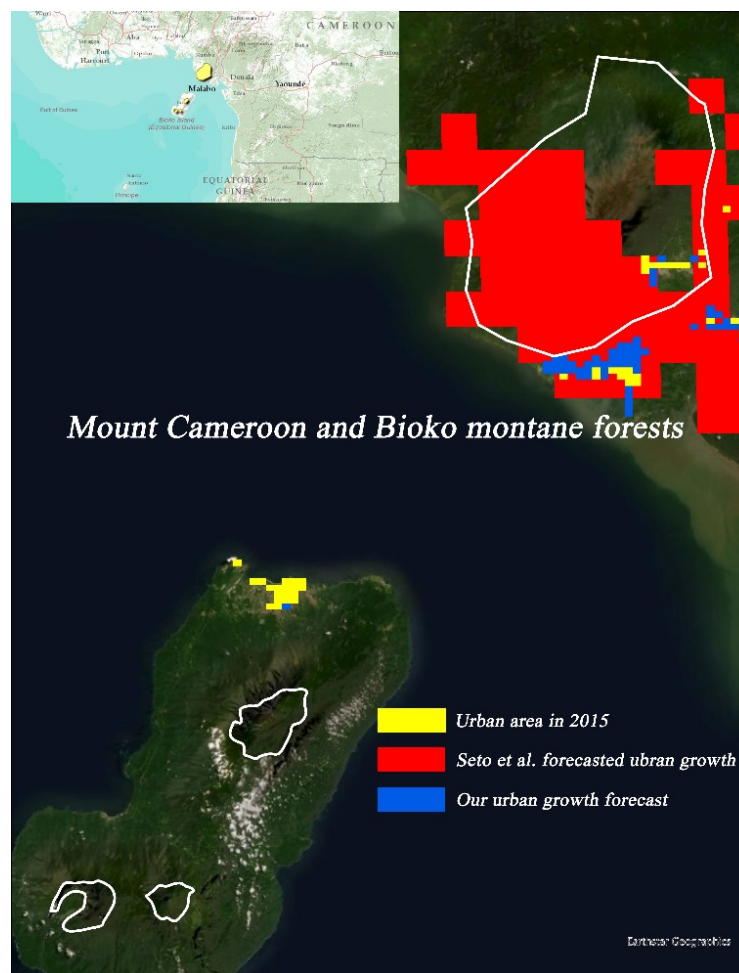

**Supplementary Fig. 28** The difference in projected urban growth by Seto et al. (2012) and ours (based on Chen et al., 2020) in the Mount Cameroon and Bioko montane forests. White lines indicate the boundary of the ecoregion.

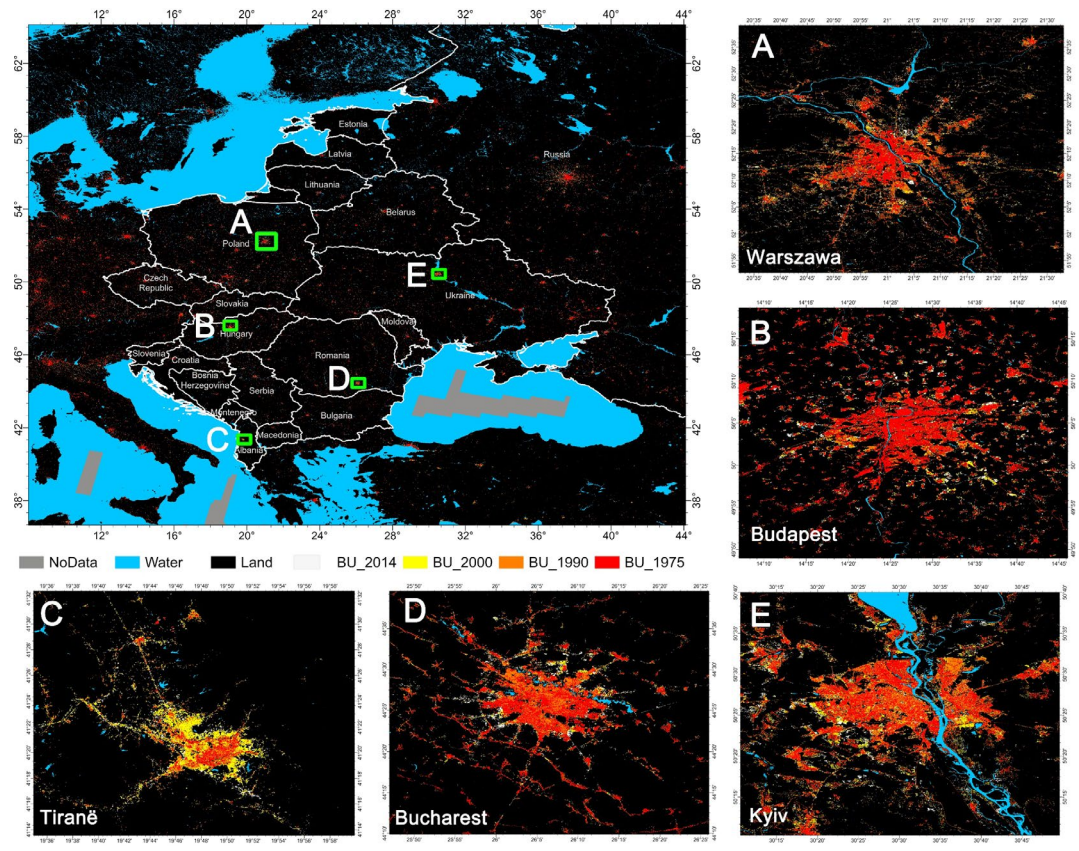

**Supplementary Fig. 29 Human settlement expansion in the cities of Eastern Europe from 1975 to 2014. Data derived from the global human settlement layer (GHSL).**

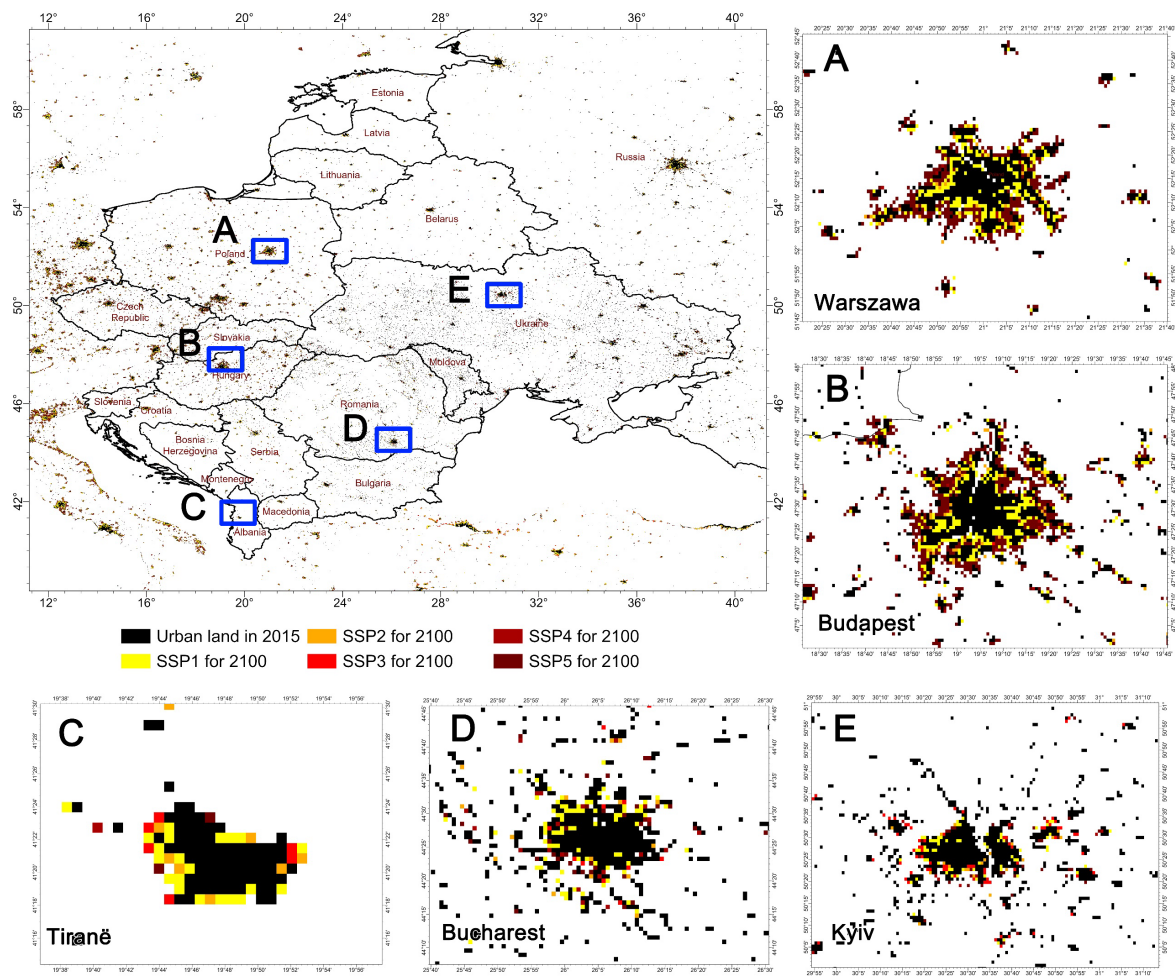

Supplementary Fig. 30 Future urban expansion in the cities of Eastern Europe from 2015 to 2100 across SSPs. These results are based on Chen et al., 2020.

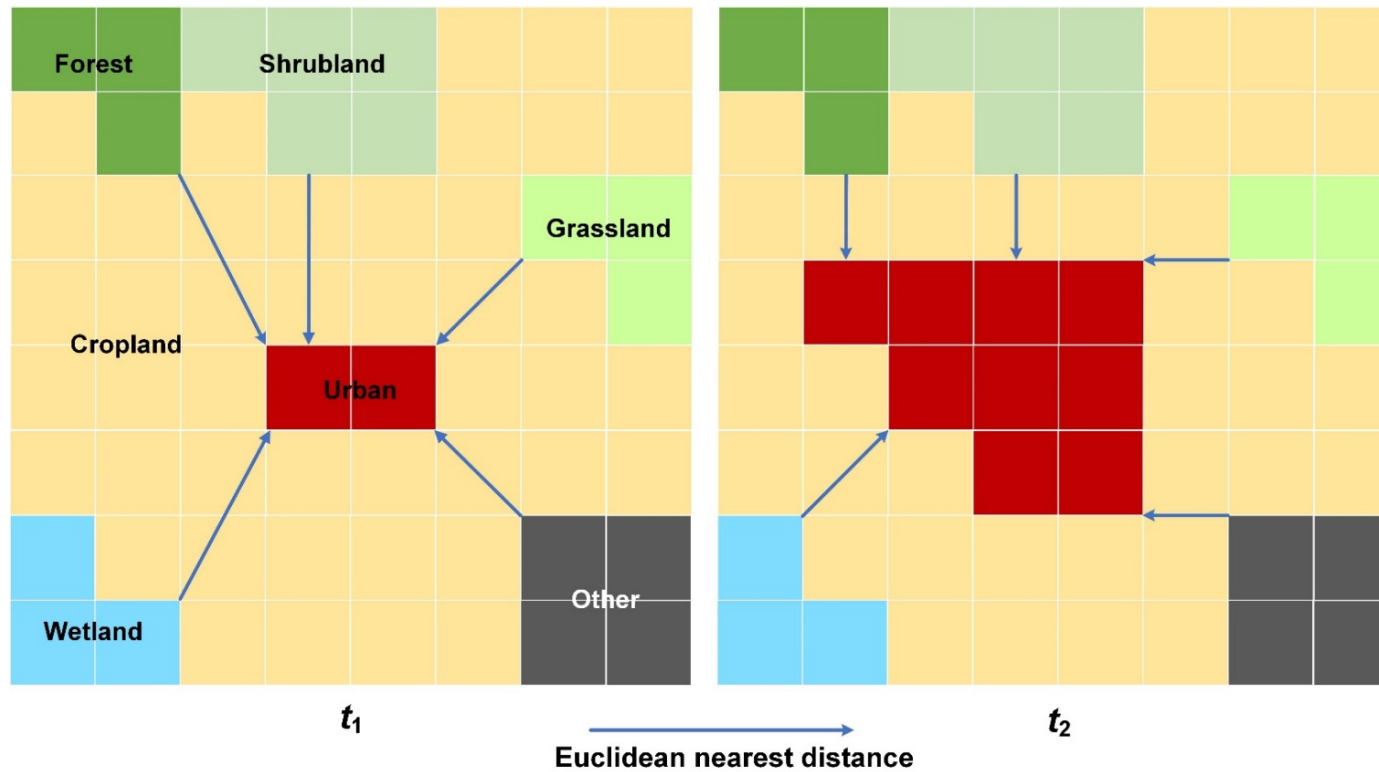

**Supplementary Fig. 31 Illustration of changes in the Euclidean nearest distance between urban areas and natural habitat due to future urban expansion.** Euclidean nearest distance between urban land and natural habitat gradually decreases from  $t_1$  to  $t_2$  due to rapid urban expansion.



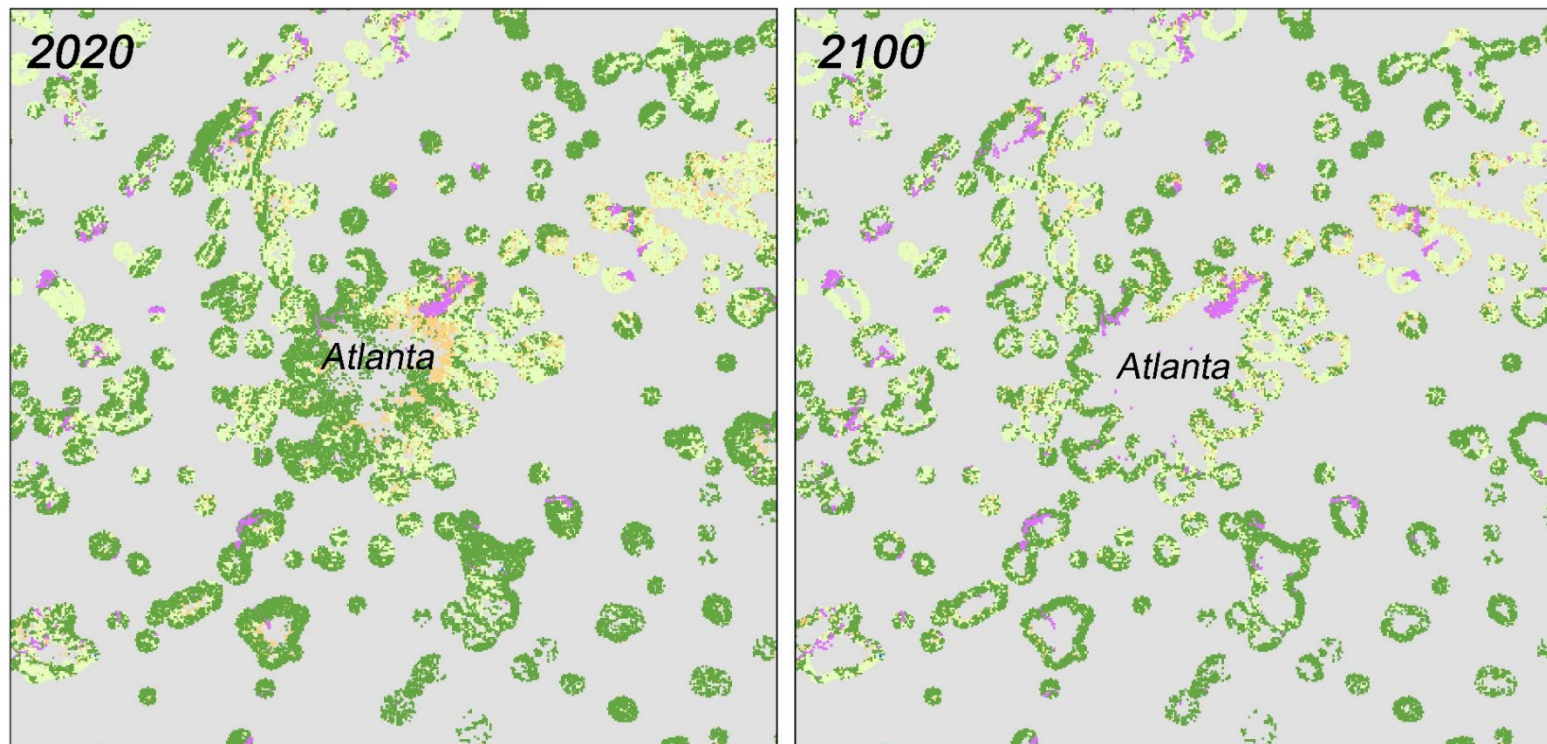

Natural habitats in 5-km buffer of urban land

Forest
  Shrubland
  Grassland
  Wetland
  Other
  > 5-km buffer

**Supplementary Fig. 32 Illustration of habitat fragmentation changes due to future urban expansion. Case of Atlanta in the US between 2020 and 2100 under SSP5.**

**Supplementary Table 1. Reclassification of ESA-CCI land cover classes in this study for identification of natural habitat.**

| ID  | ESA-CCI and cover class                                                            | Cropland | Urban land | Natural habitat |           |           |         |       |
|-----|------------------------------------------------------------------------------------|----------|------------|-----------------|-----------|-----------|---------|-------|
|     |                                                                                    |          |            | Forest          | Shrubland | Grassland | Wetland | Other |
| 0   | No data                                                                            | 0        | 0          | 0               | 0         | 0         | 0       | 1     |
| 10  | Cropland, rainfed                                                                  | 1        | 0          | 0               | 0         | 0         | 0       | 0     |
| 20  | Cropland, irrigated or post-flooding                                               | 1        | 0          | 0               | 0         |           | 0       | 0     |
| 30  | Mosaic cropland (>50%) / natural vegetation (tree, shrub, herbaceous cover) (<50%) | 1        | 0          | 0               | 0         | 0         | 0       | 0     |
| 40  | Mosaic natural vegetation (tree, shrub, herbaceous cover) (>50%) / cropland (<50%) | 1        | 0          | 0               | 0         | 0         | 0       | 0     |
| 50  | Tree cover, broadleaved, evergreen, closed to open (>15%)                          | 0        | 0          | 1               | 0         | 0         | 0       | 0     |
| 60  | Tree cover, broadleaved, deciduous, closed to open (>15%)                          | 0        | 0          | 1               | 0         | 0         | 0       | 0     |
| 70  | Tree cover, needleleaved, evergreen, closed to open (>15%)                         | 0        | 0          | 1               | 0         | 0         | 0       | 0     |
| 80  | Tree cover, needleleaved, deciduous, closed to open (>15%)                         | 0        | 0          | 1               | 0         |           | 0       | 0     |
| 90  | Tree cover, mixed leaf type (broadleaved and needleleaved)                         | 0        | 0          | 1               | 0         | 0         | 0       | 0     |
| 100 | Mosaic tree and shrub (>50%) / herbaceous cover (<50%)                             | 0        | 0          | 0               | 1         | 0         | 0       | 0     |
| 110 | Mosaic herbaceous cover (>50%) / tree and shrub (<50%)                             | 0        | 0          | 0               | 1         | 0         | 0       | 0     |
| 120 | Shrubland                                                                          | 0        | 0          | 0               | 1         | 0         | 0       | 0     |
| 130 | Grassland                                                                          | 0        | 0          | 0               | 0         | 1         | 0       | 0     |
| 140 | Lichens and mosses                                                                 | 0        | 0          | 0               | 0         | 1         | 0       | 0     |
| 150 | Sparse vegetation (tree, shrub, herbaceous cover) (<15%)                           | 0        | 0          | 0               | 1         | 0         | 0       | 0     |
| 160 | Tree cover, flooded, fresh or brakish water                                        | 0        | 0          | 1               | 0         | 0         | 0       | 0     |
| 170 | Tree cover, flooded, saline water                                                  | 0        | 0          | 1               | 0         | 0         | 0       | 0     |
| 180 | Shrub or herbaceous cover, flooded, fresh/saline/brakish water                     | 0        | 0          | 0               | 0         | 0         | 1       | 0     |
| 190 | Urban areas                                                                        | 0        | 1          | 0               | 0         | 0         | 0       | 0     |
| 200 | Bare areas                                                                         | 0        | 0          | 0               | 0         | 0         | 0       | 1     |
| 210 | Water bodies                                                                       | 0        | 0          | 0               | 0         | 0         | 0       | 1     |
| 220 | Permanent snow and ice                                                             | 0        | 0          | 0               | 0         | 0         | 0       | 1     |

Note: This reclassification system was based on the Land Cover CCI product user guide version 2.0, van Vliet, J. (2019), and EUNIS Habitat Classification Revised 2004.

**Supplementary Table 2. Estimated urban expansion-caused habitat loss areas across top 30 countries or regions by 2100.**

| Country or region name | ISO3 | SSP1 (km <sup>2</sup> ) | SSP2 (km <sup>2</sup> ) | SSP3 (km <sup>2</sup> ) | SSP4 (km <sup>2</sup> ) | SSP5 (km <sup>2</sup> ) | Average of five SSPs (km <sup>2</sup> ) | Rank |
|------------------------|------|-------------------------|-------------------------|-------------------------|-------------------------|-------------------------|-----------------------------------------|------|
| United States          | USA  | 7379006                 | 6803376                 | 1255513                 | 3864061                 | 17203878                | 7301167                                 | 1    |
| Nigeria                | NGA  | 603657                  | 849182                  | 1016400                 | 1447065                 | 754445                  | 934150                                  | 2    |
| Australia              | AUS  | 808930                  | 806035                  | 216312                  | 586775                  | 1689172                 | 821445                                  | 3    |
| Germany                | DEU  | 473524                  | 404182                  | 24306                   | 199999                  | 1294032                 | 479209                                  | 4    |
| United Kingdom         | GBR  | 483359                  | 441249                  | 38969                   | 239744                  | 1089061                 | 458476                                  | 5    |
| Saudi Arabia           | SAU  | 264804                  | 363380                  | 454780                  | 449952                  | 409465                  | 388476                                  | 6    |
| Canada                 | CAN  | 351989                  | 337725                  | 54869                   | 205145                  | 971988                  | 384343                                  | 7    |
| Iran                   | IRN  | 228015                  | 319773                  | 475741                  | 516259                  | 255778                  | 359113                                  | 8    |
| Brazil                 | BRA  | 245463                  | 353711                  | 697405                  | 194870                  | 267456                  | 351781                                  | 9    |
| China                  | CHN  | 359564                  | 300081                  | 229957                  | 299938                  | 406636                  | 319235                                  | 10   |
| India                  | IND  | 241471                  | 285014                  | 340881                  | 284342                  | 284159                  | 287174                                  | 11   |
| Mexico                 | MEX  | 165534                  | 274911                  | 650901                  | 150053                  | 145618                  | 277403                                  | 12   |
| South Africa           | ZAF  | 268738                  | 278488                  | 320087                  | 142797                  | 359461                  | 273914                                  | 13   |
| New Zealand            | NZL  | 198262                  | 193526                  | 31322                   | 127575                  | 556712                  | 221479                                  | 14   |
| United Arab Emirates   | ARE  | 125393                  | 201459                  | 261952                  | 262137                  | 228210                  | 215830                                  | 15   |

|             |     |        |        |        |        |        |        |    |
|-------------|-----|--------|--------|--------|--------|--------|--------|----|
| France      | FRA | 215573 | 190103 | 12033  | 90405  | 560738 | 213770 | 16 |
| Norway      | NOR | 187078 | 176545 | 32344  | 107201 | 517276 | 204089 | 17 |
| Chad        | TCD | 53273  | 136078 | 198399 | 386373 | 135670 | 181958 | 18 |
| Sudan       | SDN | 158103 | 170603 | 180203 | 219477 | 156003 | 176878 | 19 |
| Spain       | ESP | 171709 | 155894 | 9322   | 80611  | 406357 | 164779 | 20 |
| Netherlands | NLD | 154885 | 145219 | 8800   | 71991  | 397455 | 155670 | 21 |
| Turkey      | TUR | 116856 | 166419 | 222324 | 106328 | 146663 | 151718 | 22 |
| Switzerland | CHE | 150225 | 135511 | 31667  | 98888  | 306211 | 144500 | 23 |
| Italy       | ITA | 147471 | 129791 | 8517   | 65851  | 363475 | 143021 | 24 |
| Guatemala   | GTM | 78957  | 112957 | 196014 | 230657 | 64457  | 136608 | 25 |
| Venezuela   | VEN | 97942  | 139302 | 254193 | 91771  | 97520  | 136146 | 26 |
| Iraq        | IRQ | 79078  | 114177 | 178162 | 194832 | 94673  | 132184 | 27 |
| Russia      | RUS | 108168 | 199634 | 29692  | 71331  | 247948 | 131355 | 28 |
| Zambia      | ZMB | 94951  | 105160 | 109695 | 133288 | 94483  | 107515 | 29 |
| Zimbabwe    | ZWE | 90061  | 100061 | 104507 | 138291 | 87673  | 104119 | 30 |

**Supplementary Table 3. Estimated urban expansion-caused habitat loss across different biome types around the world.**

| Biome name                                                    | Urban expansion-caused habitat loss and proportion of the biome area between 2015-2100 (km <sup>2</sup> ) under SSP scenarios |              |              |              |               |
|---------------------------------------------------------------|-------------------------------------------------------------------------------------------------------------------------------|--------------|--------------|--------------|---------------|
|                                                               | SSP1                                                                                                                          | SSP2         | SSP3         | SSP4         | SSP5          |
| Tropical and subtropical moist broadleaf forests              | 12705 (0.06)                                                                                                                  | 15557 (0.08) | 21011 (0.11) | 18226 (0.09) | 15921 (0.08)  |
| Tropical and subtropical dry broadleaf forests                | 1300 (0.04)                                                                                                                   | 1783 (0.06)  | 3165 (0.11)  | 1550 (0.05)  | 1767 (0.06)   |
| Tropical and subtropical coniferous forests                   | 967 (0.14)                                                                                                                    | 1420 (0.20)  | 2671 (0.38)  | 1860 (0.26)  | 847 (0.12)    |
| Temperate broadleaf and mixed forests                         | 74174 (0.58)                                                                                                                  | 68929 (0.54) | 15169 (0.12) | 40635 (0.32) | 174038 (1.36) |
| Temperate coniferous forests                                  | 12589 (0.31)                                                                                                                  | 11394 (0.28) | 2120 (0.05)  | 6425 (0.16)  | 32805 (0.80)  |
| Boreal forests/taiga                                          | 1962 (0.01)                                                                                                                   | 2128 (0.01)  | 291 (0.00)   | 1004 (0.01)  | 5883 (0.04)   |
| Tropical and subtropical grasslands, savannas, and shrublands | 13515 (0.07)                                                                                                                  | 15410 (0.08) | 15754 (0.08) | 19334 (0.1)  | 16975 (0.08)  |
| Temperate grasslands, savannas, and shrublands                | 12633 (0.13)                                                                                                                  | 12406 (0.12) | 5945 (0.06)  | 8502 (0.08)  | 25435 (0.25)  |
| Flooded grasslands and savannas                               | 1158 (0.11)                                                                                                                   | 1816 (0.17)  | 2285 (0.21)  | 3943 (0.36)  | 2017 (0.18)   |
| Montane grasslands and shrublands                             | 2640 (0.05)                                                                                                                   | 2862 (0.06)  | 3411 (0.07)  | 2162 (0.04)  | 3144 (0.06)   |
| Tundra                                                        | 226 (0.00)                                                                                                                    | 215 (0.00)   | 29 (0.00)    | 134 (0.00)   | 668 (0.01)    |
| Mediterranean forests, woodlands, and scrub                   | 10403 (0.32)                                                                                                                  | 10825 (0.34) | 6739 (0.21)  | 7962 (0.25)  | 19881 (0.62)  |
| Deserts and xeric shrublands                                  | 16558 (0.06)                                                                                                                  | 21102 (0.08) | 26237 (0.09) | 22771 (0.08) | 24958 (0.09)  |
| Mangroves                                                     | 1136 (0.33)                                                                                                                   | 1336 (0.39)  | 1894 (0.55)  | 1417 (0.41)  | 1254 (0.36)   |

**Supplementary Table 4. Spatial overlap between future urban expansion and conservation prioritization schemes.**

| SSP scenarios | Year | Protected areas (km <sup>2</sup> ) | Biodiversity hotspots (km <sup>2</sup> ) | Global 200 (km <sup>2</sup> ) | Last of the Wild (km <sup>2</sup> ) |
|---------------|------|------------------------------------|------------------------------------------|-------------------------------|-------------------------------------|
| <b>SSP1</b>   | 2015 | 30594 (0.0564)                     | 228321 (0.9161)                          | 210807 (0.3838)               | 1684 (0.0030)                       |
|               | 2020 | 30944 (0.0571)                     | 246107 (0.9875)                          | 228995 (0.4169)               | 1689 (0.0030)                       |
|               | 2030 | 35753 (0.0659)                     | 275089 (1.1038)                          | 258234 (0.4701)               | 1701 (0.0030)                       |
|               | 2040 | 40444 (0.0746)                     | 299801(1.2029)                           | 282010 (0.5134)               | 1708 (0.0030)                       |
|               | 2050 | 44584 (0.0822)                     | 318726 (1.2789)                          | 299302 (0.5449)               | 1722 (0.0030)                       |
|               | 2060 | 48165 (0.0888)                     | 333257 (1.3372)                          | 313066 (0.5699)               | 1733 (0.0031)                       |
|               | 2070 | 50873 (0.0938)                     | 344443 (1.3821)                          | 323420 (0.5888)               | 1736 (0.0031)                       |
|               | 2080 | 52881 (0.0975)                     | 352846 (1.4158)                          | 331296 (0.6031)               | 1752 (0.0031)                       |
|               | 2090 | 54250 (0.1001)                     | 358256 (1.4375)                          | 336018 (0.6117)               | 1755 (0.0031)                       |
|               | 2100 | 54786 (0.1010)                     | 360408 (1.4461)                          | 337992 (0.6153)               | 1757 (0.0031)                       |
| <b>SPP2</b>   | 2020 | 30674 (0.0566)                     | 244722 (0.9819)                          | 227623 (0.4144)               | 1687 (0.0030)                       |
|               | 2030 | 34931 (0.0644)                     | 272655 (1.0940)                          | 255717 (0.4655)               | 1700 (0.0030)                       |
|               | 2040 | 39179 (0.0723)                     | 297369 (1.1932)                          | 279259 (0.5084)               | 1706 (0.0030)                       |
|               | 2050 | 42899 (0.0791)                     | 317405 (1.2736)                          | 297320 (0.5413)               | 1724 (0.0030)                       |
|               | 2060 | 46401 (0.0856)                     | 334738 (1.3431)                          | 312644 (0.5692)               | 1751 (0.0031)                       |
|               | 2070 | 49458 (0.0912)                     | 349205 (1.4012)                          | 325499 (0.5926)               | 1760 (0.0031)                       |
|               | 2080 | 52234 (0.0963)                     | 360202 (1.4453)                          | 335440 (0.6107)               | 1778 (0.0031)                       |
|               | 2090 | 54414 (0.1004)                     | 369078 (1.4809)                          | 343001 (0.6244)               | 1789 (0.0032)                       |

---

|             |      |                |                 |                 |               |
|-------------|------|----------------|-----------------|-----------------|---------------|
|             | 2100 | 56056 (0.1034) | 375203 (1.5055) | 348131 (0.6338) | 1789 (0.0032) |
| <b>SPP3</b> | 2020 | 30069 (0.0555) | 242064 (0.9713) | 224739 (0.4091) | 1687 (0.0030) |
|             | 2030 | 32237 (0.0595) | 264674 (1.0620) | 246405 (0.4486) | 1700 (0.0030) |
|             | 2040 | 34171 (0.0630) | 283442 (1.1373) | 262872 (0.4785) | 1706 (0.0030) |
|             | 2050 | 36029 (0.0664) | 300366 (1.2052) | 276513 (0.5034) | 1727 (0.0030) |
|             | 2060 | 38054 (0.0702) | 315329 (1.2652) | 288230 (0.5247) | 1758 (0.0031) |
|             | 2070 | 40044 (0.0739) | 330006 (1.3241) | 299013 (0.5443) | 1767 (0.0031) |
|             | 2080 | 42192 (0.0778) | 344017 (1.3804) | 310013 (0.5644) | 1781 (0.0031) |
|             | 2090 | 44334 (0.0818) | 357510 (1.4345) | 321023 (0.5844) | 1784 (0.0031) |
|             | 2100 | 46705 (0.0861) | 372233 (1.4936) | 332959 (0.6061) | 1843 (0.0033) |
| <b>SPP4</b> | 2020 | 30745 (0.0567) | 245799 (0.9863) | 228681 (0.4163) | 1694 (0.0030) |
|             | 2030 | 34737 (0.0641) | 273236 (1.0963) | 255875 (0.4658) | 1705 (0.0030) |
|             | 2040 | 38462 (0.0709) | 295756 (1.1867) | 276066 (0.5026) | 1725 (0.0030) |
|             | 2050 | 42206 (0.0778) | 314099 (1.2603) | 290932 (0.5296) | 1751 (0.0031) |
|             | 2060 | 45577 (0.0841) | 329310 (1.3213) | 302878 (0.5514) | 1768 (0.0031) |
|             | 2070 | 48748 (0.0899) | 343022 (1.3764) | 313220 (0.5702) | 1816 (0.0032) |
|             | 2080 | 50068 (0.0923) | 355143 (1.4250) | 321465 (0.5852) | 1865 (0.0033) |
|             | 2090 | 50726 (0.0936) | 365389 (1.4661) | 328148 (0.5974) | 1871 (0.0033) |
|             | 2100 | 51347 (0.0947) | 375428 (1.5064) | 334912 (0.6097) | 1897 (0.0033) |
| <b>SPP5</b> | 2020 | 31195 (0.0575) | 247218 (0.9920) | 229987 (0.4187) | 1688 (0.0030) |

---

---

|      |                |                 |                 |               |
|------|----------------|-----------------|-----------------|---------------|
| 2030 | 37079 (0.0684) | 280665 (1.1262) | 263861 (0.4803) | 1702 (0.0030) |
| 2040 | 43689 (0.0806) | 311238 (1.2488) | 293873 (0.5350) | 1712 (0.0030) |
| 2050 | 50950 (0.0940) | 339310 (1.3615) | 321001 (0.5844) | 1730 (0.0031) |
| 2060 | 58604 (0.1081) | 365214 (1.4654) | 346313 (0.6304) | 1747 (0.0031) |
| 2070 | 66326 (0.1223) | 389573 (1.5631) | 370184 (0.6739) | 1761 (0.0031) |
| 2080 | 74238 (0.1369) | 412328 (1.6544) | 393178 (0.7158) | 1772 (0.0031) |
| 2090 | 82181 (0.1516) | 433147 (1.7380) | 414532 (0.7546) | 1781 (0.0031) |
| 2100 | 89901 (0.1658) | 452478 (1.8156) | 434115 (0.7903) | 1785 (0.0031) |

---

Note: Percentage overlap of future urban expansion with conservation prioritization schemes are presented in parentheses.



**Supplementary Table 5. Estimated urban expansion-caused edge distance change areas across top 30 countries or regions by 2100.**

| Country or region name | ISO3 | SSP1(km <sup>2</sup> ) | SSP2(km <sup>2</sup> ) | SSP3(km <sup>2</sup> ) | SSP4(km <sup>2</sup> ) | SSP5(km <sup>2</sup> ) | Average of five SSPs (km <sup>2</sup> ) | Rank |
|------------------------|------|------------------------|------------------------|------------------------|------------------------|------------------------|-----------------------------------------|------|
| Mauritania             | MRT  | 121065                 | 77786                  | 78330                  | 77484                  | 77387                  | 86410                                   | 1    |
| Algeria                | DZA  | 57204                  | 52514                  | 56468                  | 52854                  | 53020                  | 54412                                   | 2    |
| Saudi Arabia           | SAU  | 31939                  | 38142                  | 73791                  | 72196                  | 40529                  | 51319                                   | 3    |
| Western Sahara         | ESH  | 57226                  | 40494                  | 46822                  | 39717                  | 39978                  | 44847                                   | 4    |
| United States          | USA  | 27497                  | 25473                  | 3848                   | 14251                  | 64922                  | 27198                                   | 5    |
| Yemen                  | YEM  | 5805                   | 5919                   | 18121                  | 14342                  | 7574                   | 10352                                   | 6    |
| Iran                   | IRN  | 6528                   | 9718                   | 13366                  | 13723                  | 7693                   | 10206                                   | 7    |
| Egypt                  | EGY  | 8642                   | 8183                   | 11134                  | 7272                   | 7653                   | 8577                                    | 8    |
| Mexico                 | MEX  | 3284                   | 4975                   | 11904                  | 2271                   | 2183                   | 4923                                    | 9    |
| Nigeria                | NGA  | 3522                   | 4597                   | 4161                   | 6768                   | 3580                   | 4526                                    | 10   |
| Australia              | AUS  | 4272                   | 4354                   | 1290                   | 3029                   | 7782                   | 4145                                    | 11   |
| Iraq                   | IRQ  | 2094                   | 3407                   | 5424                   | 5873                   | 2353                   | 3830                                    | 12   |
| New Zealand            | NZL  | 3924                   | 3655                   | 889                    | 2628                   | 6741                   | 3567                                    | 13   |
| United Arab Emirates   | ARE  | 1917                   | 3008                   | 3656                   | 4157                   | 3016                   | 3151                                    | 14   |
| Kuwait                 | KWT  | 2279                   | 2841                   | 3193                   | 3204                   | 3107                   | 2925                                    | 15   |

---

|                |     |      |      |      |      |      |      |    |
|----------------|-----|------|------|------|------|------|------|----|
| Jordan         | JOR | 1783 | 2466 | 3860 | 3807 | 1917 | 2767 | 16 |
| Kenya          | KEN | 90   | 3846 | 3880 | 3897 | 1133 | 2569 | 17 |
| Caspian Sea    | XCA | 2003 | 1605 | 4096 | 2032 | 2105 | 2368 | 18 |
| South Africa   | ZAF | 2031 | 2205 | 2532 | 1056 | 2733 | 2111 | 19 |
| Argentina      | ARG | 1179 | 2081 | 4573 | 1050 | 1206 | 2018 | 20 |
| Oman           | OMN | 1419 | 2075 | 2175 | 2305 | 2101 | 2015 | 21 |
| United Kingdom | GBR | 2276 | 1973 | 127  | 1054 | 4089 | 1904 | 22 |
| Canada         | CAN | 1366 | 1372 | 190  | 781  | 5207 | 1783 | 23 |
| Libya          | LBY | 1413 | 574  | 3199 | 3285 | 434  | 1781 | 24 |
| Kazakhstan     | KAZ | 1536 | 1561 | 2290 | 1526 | 1548 | 1692 | 25 |
| Sudan          | SDN | 1196 | 1631 | 1679 | 2075 | 1634 | 1643 | 26 |
| Chile          | CHL | 1321 | 1651 | 2762 | 967  | 1119 | 1564 | 27 |
| Brazil         | BRA | 912  | 1585 | 3448 | 617  | 1027 | 1518 | 28 |
| Ecuador        | ECU | 1043 | 1110 | 2614 | 1135 | 1116 | 1404 | 29 |
| Cameroon       | CMR | 816  | 971  | 1376 | 2405 | 1380 | 1390 | 30 |

---

**Supplementary Table 6. Conservation priority ecoregions for future urban-caused habitat and species loss.**

| <b>Ecoregions Name</b>                  | <b>Urban area in 2015 (km<sup>2</sup>)</b> | <b>Projected mean urban growth area by 2100 (km<sup>2</sup>, SSP1-SSP5)</b> | <b>Projected mean urban growth rate by 2100 (SSP1-SSP5)</b> | <b>Mean small-ranged species number of vertebrates</b> |
|-----------------------------------------|--------------------------------------------|-----------------------------------------------------------------------------|-------------------------------------------------------------|--------------------------------------------------------|
| Albertine Rift montane forests          | 219                                        | 59.80                                                                       | 27                                                          | 63                                                     |
| Cameroonian Highlands forests           | 133                                        | 142.80                                                                      | 107                                                         | 42                                                     |
| Cauca Valley montane forests            | 145                                        | 149.20                                                                      | 103                                                         | 127                                                    |
| Central American dry forests            | 635                                        | 213.80                                                                      | 34                                                          | 40                                                     |
| Central American montane forests        | 142                                        | 175.00                                                                      | 123                                                         | 76                                                     |
| Central American pine-oak forests       | 993                                        | 1101.00                                                                     | 111                                                         | 61                                                     |
| Central Andean wet puna                 | 431                                        | 134.20                                                                      | 31                                                          | 61                                                     |
| Cordillera La Costa montane forests     | 252                                        | 113.60                                                                      | 45                                                          | 71                                                     |
| Costa Rican seasonal moist forests      | 384                                        | 171.60                                                                      | 45                                                          | 56                                                     |
| East African montane forests            | 51                                         | 145.20                                                                      | 285                                                         | 43                                                     |
| Eastern Cordillera real montane forests | 344                                        | 77.20                                                                       | 22                                                          | 153                                                    |
| Hispaniolan moist forests               | 622                                        | 166.40                                                                      | 27                                                          | 43                                                     |
| Isthmian-Atlantic moist forests         | 223                                        | 60.80                                                                       | 27                                                          | 94                                                     |
| La Costa xeric shrublands               | 839                                        | 480.80                                                                      | 57                                                          | 34                                                     |
| Madagascar subhumid forests             | 186                                        | 363.00                                                                      | 195                                                         | 41                                                     |
| Magdalena Valley dry forests            | 61                                         | 51.20                                                                       | 84                                                          | 62                                                     |
| Magdalena Valley montane forests        | 920                                        | 407.60                                                                      | 44                                                          | 131                                                    |
| Northwestern Andean montane forests     | 519                                        | 146.20                                                                      | 28                                                          | 170                                                    |
| Paraguana xeric scrub                   | 223                                        | 144.00                                                                      | 65                                                          | 45                                                     |
| Peruvian Yungas                         | 221                                        | 49.80                                                                       | 23                                                          | 123                                                    |

|                                              |      |         |     |     |
|----------------------------------------------|------|---------|-----|-----|
| Petén-Veracruz moist forests                 | 397  | 190.80  | 48  | 52  |
| Puerto Rican dry forests                     | 138  | 131.80  | 96  | 38  |
| Puerto Rican moist forests                   | 978  | 853.00  | 87  | 45  |
| Serra do Mar coastal forests                 | 5226 | 1097.46 | 21  | 53  |
| Sierra Madre de Chiapas moist forests        | 77   | 122.40  | 159 | 65  |
| Southern Atlantic mangroves                  | 746  | 222.60  | 30  | 38  |
| Southern Pacific dry forests                 | 437  | 129.60  | 30  | 49  |
| Trans-Mexican Volcanic Belt pine-oak forests | 1145 | 250.60  | 22  | 45  |
| Tumbes-Piura dry forests                     | 110  | 65.20   | 59  | 73  |
| Venezuelan Andes montane forests             | 188  | 59.20   | 31  | 120 |

**Supplementary Table 7. Estimated urban expansion-caused average species richness loss per 10-km grid cell across top 30 countries or regions by 2100.**

| Country or region name | ISO3 | SSP1 | SSP2 | SSP3 | SSP4 | SSP5 | Average of five SSPs | Rank |
|------------------------|------|------|------|------|------|------|----------------------|------|
| Kenya                  | KEN  | 40   | 39   | 39   | 42   | 38   | 39                   | 1    |
| Swaziland              | SWZ  | 28   | 36   | 38   | 36   | 32   | 34                   | 2    |
| Brunei                 | BRN  | 34   | 34   | 35   | 24   | 37   | 33                   | 3    |
| Zambia                 | ZMB  | 30   | 32   | 33   | 36   | 30   | 32                   | 4    |
| Republic of Congo      | COG  | 28   | 28   | 28   | 34   | 30   | 30                   | 5    |
| Zimbabwe               | ZWE  | 28   | 29   | 29   | 34   | 27   | 29                   | 6    |
| Malawi                 | MWI  | 26   | 27   | 27   | 33   | 25   | 28                   | 7    |
| Gambia                 | GMB  | 22   | 26   | 26   | 41   | 23   | 28                   | 8    |
| Chad                   | TCD  | 19   | 27   | 30   | 32   | 28   | 27                   | 9    |
| Nigeria                | NGA  | 23   | 25   | 27   | 34   | 24   | 27                   | 10   |
| Mozambique             | MOZ  | 23   | 25   | 27   | 31   | 23   | 26                   | 11   |
| Cameroon               | CMR  | 25   | 24   | 25   | 30   | 24   | 26                   | 12   |
| Liberia                | LBR  | 16   | 21   | 26   | 42   | 17   | 24                   | 13   |
| Togo                   | TGO  | 18   | 22   | 27   | 34   | 20   | 24                   | 14   |

---

|                     |     |    |    |    |    |    |    |    |
|---------------------|-----|----|----|----|----|----|----|----|
| Uganda              | UGA | 22 | 22 | 23 | 27 | 22 | 23 | 15 |
| Tanzania            | TZA | 21 | 22 | 23 | 25 | 21 | 22 | 16 |
| Gabon               | GAB | 20 | 21 | 21 | 22 | 20 | 21 | 17 |
| Senegal             | SEN | 17 | 20 | 20 | 28 | 18 | 20 | 18 |
| Benin               | BEN | 17 | 19 | 20 | 26 | 18 | 20 | 19 |
| Rwanda              | RWA | 18 | 18 | 20 | 24 | 19 | 20 | 20 |
| Ghana               | GHA | 17 | 18 | 19 | 26 | 16 | 19 | 21 |
| Equatorial Guinea   | GNQ | 18 | 18 | 21 | 20 | 16 | 19 | 22 |
| Sierra Leone        | SLE | 16 | 16 | 17 | 26 | 16 | 18 | 23 |
| Guinea              | GIN | 14 | 15 | 16 | 28 | 13 | 17 | 24 |
| Liechtenstein       | LIE | 19 | 17 | 3  | 12 | 32 | 17 | 25 |
| Trinidad and Tobago | TTO | 11 | 16 | 33 | 11 | 12 | 17 | 26 |
| Burundi             | BDI | 16 | 14 | 16 | 22 | 14 | 16 | 27 |
| Vatican City        | VAT | 19 | 18 | 6  | 16 | 20 | 16 | 28 |
| Côte d'Ivoire       | CIV | 15 | 15 | 16 | 19 | 14 | 16 | 29 |
| Suriname            | SUR | 11 | 13 | 34 | 10 | 8  | 15 | 30 |

---

**Supplementary Table 8. Summary of assumptions about urbanization patterns for five SSPs.**

| <b>Elements</b>                         | <b>SSP1</b>  | <b>SSP2</b>         | <b>SPP3</b> | <b>SSP4</b> | <b>SSP5</b> |
|-----------------------------------------|--------------|---------------------|-------------|-------------|-------------|
| Urbanization in high- income countries  | Fast         | Central             | Slow        | Central     | Fast        |
| Urbanization in medium-income countries | Fast         | Central             | Slow        | Fast        | Fast        |
| Urbanization in low-income countries    | Fast         | Central             | Slow        | Fast        | Fast        |
| Urbanization rate by 2100               | 92.6%        | 79.7%               | 58.4%       | 91.7%       | 93.0%       |
| Spatial pattern                         | Concentrated | Historical patterns | Mixed       | Mixed       | Sprawl      |
| Migration                               | Moderate     | Intermediate        | Low         | Mixed       | Fast        |

**Supplementary Table 9. Assumptions for urban planning and protected areas under SSPs.**

| Scenarios | Urban planning assumptions                                                                                                                         | Protected areas assumptions (Environment assumptions)                                                                                                                                                                                                                                                                                                                                                                                                                             |
|-----------|----------------------------------------------------------------------------------------------------------------------------------------------------|-----------------------------------------------------------------------------------------------------------------------------------------------------------------------------------------------------------------------------------------------------------------------------------------------------------------------------------------------------------------------------------------------------------------------------------------------------------------------------------|
| SSP1      | Urbanization is well managed, and urban planning is promoted in tandem with high urbanization rates.                                               | It is an environment-friendly development pattern to strengthen the protection of fragile ecosystems and regions such as protected areas. Land use is strictly regulated. Urban expansion has barely encroached on protected areas. Protected areas are effective. <i>Protected areas are on track to meet Aichi's 17% target due to strong land-use change regulation.</i>                                                                                                       |
| SSP2      | Moderate urban planning regulation.                                                                                                                | Growing energy demand has led to the continuous environmental deterioration. Moderate regulation of land use leads to a slow decline in deforestation rates. Moderate land use regulation makes the effectiveness of protected areas in the middle level. <i>Protected areas are being moderately encroached upon. Protected areas are expected to meet the Aichi target of 17% of land area due to moderate land use change regulation gradually implemented from 2010–2050.</i> |
| SSP3      | Urban settlements are poorly planned, particularly in developing countries where inequality and fragmentation cause mixed pattern of urban change. | Not enough attention has been paid to solving environmental problems, resulting in serious environmental degradation in some areas. Deforestation continues because of a lack of regulation, competition for land and the rapid expansion of agriculture. Poor land use regulation leads to low effectiveness of protected areas. Urban expansion has encroached heavily on protected areas. <i>Protected areas are under serious threat.</i>                                     |



|      |                                                                                                                                                                                                                                              |                                                                                                                                                                                                                                                                                                                                                                                                                                                                                                                                                                                |
|------|----------------------------------------------------------------------------------------------------------------------------------------------------------------------------------------------------------------------------------------------|--------------------------------------------------------------------------------------------------------------------------------------------------------------------------------------------------------------------------------------------------------------------------------------------------------------------------------------------------------------------------------------------------------------------------------------------------------------------------------------------------------------------------------------------------------------------------------|
| SSP4 | <p>Spatial development pattern varies across cities, with urban sprawl dominating in some cities, whereas better planning in cities that are predominantly inhabited by the higher-income groups leads to more concentrated development.</p> | <p>There are significant differences in environmental conditions. On the one hand, there are some areas of world concern, close to the places where middle- and high-income groups live and vacation, which are well managed. On the other hand, resource and production areas and many other out of sight places are neglected and become deteriorated. <i>Conservation of protected areas is also divided, with highly regulated and well-managed areas in middle- and high-income countries, but largely unmanaged and deteriorating areas in low-income countries.</i></p> |
| SSP5 | <p>It is difficult for urban planning to keep up with high urbanization rates, and the sprawling pattern of development is dominant.</p>                                                                                                     | <p>Regulations are imperfect, and many protected areas are not effectively protected. <i>Protected areas are under serious threat.</i></p>                                                                                                                                                                                                                                                                                                                                                                                                                                     |

**Supplementary Table 10. Modelled mean estimates (following Newbold et al. (2015), they based on PREDICTS) of relative percent biodiversity change for each Land System.**

| code | Land System                                    | Species<br>Richness<br>(SR) | SR-<br>min | SR-<br>max | Abundance<br>(CI) | CI-<br>min | CI-<br>max | Change-<br>SR (%) | Change-<br>SR-min<br>(%) | Change-<br>SR-max<br>(%) | Change-<br>CI (%) | Change-<br>CI-min<br>(%) | Change-<br>CI-max<br>(%) |
|------|------------------------------------------------|-----------------------------|------------|------------|-------------------|------------|------------|-------------------|--------------------------|--------------------------|-------------------|--------------------------|--------------------------|
| 0    | Cropland ext, few ls                           | 71.85                       | 62.65      | 82.35      | 80.80             | 62.60      | 104.20     | 31                | 20                       | 40                       | 53                | 36                       | 66                       |
| 1    | Cropland ext, bgs                              | 68.00                       | 57.40      | 80.70      | 77.25             | 56.65      | 105.70     | 27                | 18                       | 35                       | 51                | 36                       | 63                       |
| 2    | Cropland ext, pp                               | 68.00                       | 57.40      | 80.70      | 77.25             | 56.65      | 105.70     | 27                | 18                       | 35                       | 51                | 36                       | 63                       |
| 3    | Cropland med. Int, few ls                      | 66.25                       | 56.85      | 77.20      | 63.55             | 48.05      | 84.05      | 25                | 15                       | 34                       | 41                | 20                       | 56                       |
| 4    | Cropland med. int, bgs                         | 62.40                       | 51.60      | 75.55      | 60.00             | 42.10      | 85.55      | 20                | 13                       | 27                       | 37                | 21                       | 50                       |
| 5    | Cropland med. int, pp                          | 62.40                       | 51.60      | 75.55      | 60.00             | 42.10      | 85.55      | 20                | 13                       | 27                       | 37                | 21                       | 50                       |
| 6    | Cropland int, few ls                           | 67.15                       | 56.95      | 79.25      | 70.45             | 51.55      | 96.60      | 26                | 17                       | 34                       | 47                | 30                       | 59                       |
| 7    | Cropland int, bgs                              | 63.30                       | 51.70      | 77.60      | 66.90             | 45.60      | 98.10      | 21                | 15                       | 27                       | 44                | 31                       | 54                       |
| 8    | Cropland int, pp                               | 63.30                       | 51.70      | 77.60      | 66.90             | 45.60      | 98.10      | 21                | 15                       | 27                       | 44                | 31                       | 54                       |
| 14   | Mosaic cropland and forest, pp                 | 63.30                       | 51.70      | 77.60      | 66.90             | 45.60      | 98.10      | 21                | 15                       | 27                       | 44                | 31                       | 54                       |
| 15   | Mosaic cropland ext and open forest, few ls    | 71.85                       | 62.65      | 82.35      | 80.80             | 62.60      | 104.20     | 31                | 20                       | 40                       | 53                | 36                       | 66                       |
| 16   | Mosaic cropland m. int and open forest, few ls | 66.25                       | 56.85      | 77.20      | 63.55             | 48.05      | 84.05      | 25                | 15                       | 34                       | 41                | 20                       | 56                       |
| 17   | Mosaic cropland int and open forest, few ls    | 67.15                       | 56.95      | 79.25      | 70.45             | 51.55      | 96.60      | 26                | 17                       | 34                       | 47                | 30                       | 59                       |
| 18   | Dense forest                                   | 96.13                       | 90.54      | 100.39     | 98.03             | 88.28      | 108.28     | 48                | 34                       | 59                       | 62                | 38                       | 76                       |
| 19   | Open forest, few ls                            | 89.23                       | 79.54      | 100.19     | 90.96             | 71.44      | 104.63     | 44                | 34                       | 53                       | 59                | 36                       | 70                       |
| 20   | Open forest, pp                                | 88.00                       | 75.34      | 102.92     | 97.56             | 70.81      | 122.80     | 43                | 36                       | 50                       | 61                | 45                       | 70                       |
| 21   | Mosaic grassland and open forest               | 96.13                       | 90.54      | 100.39     | 98.03             | 88.28      | 108.28     | 48                | 34                       | 59                       | 62                | 38                       | 76                       |
| 22   | Mosaic grassland and bare                      | 96.13                       | 90.54      | 100.39     | 98.03             | 88.28      | 108.28     | 48                | 34                       | 59                       | 62                | 38                       | 76                       |
| 23   | Natural grassland                              | 96.13                       | 90.54      | 100.39     | 98.03             | 88.28      | 108.28     | 48                | 34                       | 59                       | 62                | 38                       | 76                       |
| 24   | Grassland, few ls                              | 70.60                       | 61.30      | 81.20      | 72.20             | 56.00      | 93.00      | 29                | 19                       | 39                       | 48                | 28                       | 62                       |

|    |                                     |       |       |        |       |       |        |    |    |    |    |    |    |
|----|-------------------------------------|-------|-------|--------|-------|-------|--------|----|----|----|----|----|----|
| 25 | Grassland, bgs                      | 62.90 | 50.80 | 77.90  | 65.10 | 44.10 | 96.00  | 21 | 15 | 26 | 42 | 30 | 52 |
| 27 | Bare,few ls                         | 70.60 | 61.30 | 81.20  | 72.20 | 56.00 | 93.00  | 29 | 19 | 39 | 48 | 28 | 62 |
| 28 | Peri-urban & villages               | 96.00 | 79.40 | 116.00 | 81.80 | 51.60 | 129.70 | 48 | 43 | 53 | 54 | 48 | 59 |
| 29 | Urban                               | 49.80 | 37.50 | 66.00  | 37.60 | 21.10 | 67.20  | 0  | 0  | 0  | 0  | 0  | 0  |
| 30 | Dense forest_CS                     | 96.13 | 90.54 | 100.39 | 98.03 | 88.28 | 108.28 | 48 | 34 | 59 | 62 | 38 | 76 |
| 31 | Open forest, few ls_CS              | 89.23 | 79.54 | 100.19 | 90.96 | 71.44 | 104.63 | 44 | 34 | 53 | 59 | 36 | 70 |
| 32 | Open forest, pp_CS                  | 88.00 | 75.34 | 102.92 | 97.56 | 70.81 | 122.80 | 43 | 36 | 50 | 61 | 45 | 70 |
| 33 | Mosaic grassland and open forest_CS | 96.13 | 90.54 | 100.39 | 98.03 | 88.28 | 108.28 | 48 | 34 | 59 | 62 | 38 | 76 |
| 34 | Mosaic grassland and bare_CS        | 96.13 | 90.54 | 100.39 | 98.03 | 88.28 | 108.28 | 48 | 34 | 59 | 62 | 38 | 76 |
| 35 | Natural grassland_CS                | 96.13 | 90.54 | 100.39 | 98.03 | 88.28 | 108.28 | 48 | 34 | 59 | 62 | 38 | 76 |
| 36 | Grassland, few ls_CS                | 70.60 | 61.30 | 81.20  | 72.20 | 56.00 | 93.00  | 29 | 19 | 39 | 48 | 28 | 62 |
| 37 | Grassland, bgs_CS                   | 62.90 | 50.80 | 77.90  | 65.10 | 44.10 | 96.00  | 21 | 15 | 26 | 42 | 30 | 52 |

Note: The values represent the percentage of remaining biodiversity expressed in terms of local species richness (SR) and abundance (CI). All values are relative to an unaffected baseline (primary vegetation, minimum intensity of use, zero population density, and maximum observed distance to a road and travel time to major city). The first number gives the mean estimate of the modeling, and the minimum and maximum numbers give a 95% confidence limit (excluding about 10% of the study data at a time under ten-fold cross-validation). ext = extensive, med. Int = medium intensity, int = intensity, ls = livestock, bgs = cattle, goat and sheep, pp = pig and poultry. Where Change-SR and Change-CI are the percent change in species richness and species richness from the original land system type to the urban land use type, respectively. Change-min and change-max also are 95% confidence limits.

## Supplementary References:

1. Jiang, L. & O'Neill, B. C. Global urbanization projections for the Shared Socioeconomic Pathways. *Global Environmental Change* **42**, 193-199, doi:10.1016/j.gloenvcha.2015.03.008 (2017).
2. Gossop, C. Low carbon cities: An introduction to the special issue. *Cities* **28**, 495-497, doi:10.1016/j.cities.2011.09.003 (2011).
3. Ewing, R. & Cervero, R. Travel and the Built Environment. *Journal of the American Planning Association* **76**, 265-294, doi:10.1080/01944361003766766 (2010).
4. Jones, B. & O'Neill, B. C. Spatially explicit global population scenarios consistent with the Shared Socioeconomic Pathways. *Environmental Research Letters* **11**, 084003, doi:10.1088/1748-9326/11/8/084003 (2016).
5. O'Neill, B. C. *et al.* The roads ahead: Narratives for shared socioeconomic pathways describing world futures in the 21st century. *Global Environmental Change* **42**, 169-180, doi:10.1016/j.gloenvcha.2015.01.004 (2017).
6. Mohan, R. The effect of population growth, the pattern of demand and of technology on the process of urbanization. *Journal of Urban Economics* **15**, 125-156, doi:10.1016/0094-1190(84)90011-1 (1984).
7. Kelley, A. C. & Williamson, J. G. Population Growth, Industrial Revolutions, and the Urban Transition. *Population and Development Review* **10**, 419-441, doi:10.2307/1973513 (1984).
8. Ledent, J. Rural-Urban Migration, Urbanization, and Economic Development. *Economic Development and Cultural Change* **30**, 507-538, doi:10.1086/452574 (1982).
9. Abdel-Rahman, A. N., Safarzadeh, M. R. & Bottomley, M. B. Economic growth and urbanization: A cross-section and time-series analysis of thirty-five developing countries. *International Review of Economics and Business* **53**, 334-348 (2006).
10. Jiang, L. Internal consistency of demographic assumptions in the shared socioeconomic pathways. *Population and Environment* **35**, 261-285, doi:10.1007/s11111-014-0206-3 (2014).
11. Fay, M. & Opal, C. *Urbanization without growth: A not so uncommon phenomenon*. Vol. 2412 (World Bank Publications, 2000).
12. Chen, G. *et al.* Global projections of future urban land expansion under shared socioeconomic pathways. *Nature Communications* **11**, doi:10.1038/s41467-020-14386-x (2020).
13. Kriegler, E. *et al.* Fossil-fueled development (SSP5): An energy and resource intensive scenario for the 21st century. *Global Environmental Change* **42**, 297-315 (2017).
14. Fricko, O. *et al.* The marker quantification of the Shared Socioeconomic Pathway 2: A middle-of-the-road scenario for the 21st century. *Global Environmental*

*Change* **42**, 251-267 (2017).

15. van Vuuren, D. P. *et al.* Energy, land-use and greenhouse gas emissions trajectories under a green growth paradigm. *Global Environmental Change* **42**, 237-250 (2017).
16. Calvin, K. *et al.* The SSP4: A world of deepening inequality. *Global Environmental Change* **42**, 284-296 (2017).
17. Fujimori, S. *et al.* SSP3: AIM implementation of Shared Socioeconomic Pathways. *Global Environmental Change* **42**, 268-283 (2017).
18. UNEP-WCMC & IUCN. *The World Database on Protected Areas (WDPA)*. <https://www.protectedplanet.net/>. Accessed 15 May 2020).
19. Jones, K. R. *et al.* One-third of global protected land is under intense human pressure. *Science* **360**, 788-791, doi:10.1126/science.aap9565 (2018).
20. Huang, X. *et al.* 30 m global impervious surface area dynamics and urban expansion pattern observed by Landsat satellites: From 1972 to 2019. *Science China Earth Sciences* **64**, 1922-1933, doi:10.1007/s11430-020-9797-9 (2021).
21. Liu, X. *et al.* High-spatiotemporal-resolution mapping of global urban change from 1985 to 2015. *Nature Sustainability*, doi:10.1038/s41893-020-0521-x (2020).
22. Gong, P. *et al.* Annual maps of global artificial impervious area (GAIA) between 1985 and 2018. *Remote Sensing of Environment* **236**, 111510, doi:10.1016/j.rse.2019.111510 (2020).
23. Pesaresi, M. *et al.* Operating procedure for the production of the Global Human Settlement Layer from Landsat data of the epochs 1975, 1990, 2000, and 2014. *Publications Office of the European Union*, 1-62 (2016).
24. Myers, N., Mittermeier, R. A., Mittermeier, C. G., da Fonseca, G. A. B. & Kent, J. Biodiversity hotspots for conservation priorities. *Nature* **403**, 853-858, doi:10.1038/35002501 (2000).
25. Hoffman, M., Koenig, K., Bunting, G., Costanza, J. & Williams, K. J. Biodiversity Hotspots (version 2016.1). *Zenodo*. <https://doi.org/10.5281/zenodo.3261807> (2016).
26. Olson, D. M. & Dinerstein, E. The Global 200: Priority Ecoregions for Global Conservation. *Annals of the Missouri Botanical Garden* **89**, 199-224, doi:10.2307/3298564 (2002).
27. Wildlife Conservation Society - WCS & Center for International Earth Science Information Network - CIESIN - Columbia University. (NASA Socioeconomic Data and Applications Center (SEDAC), Palisades, NY, 2005).
28. Hudson, L. N. *et al.* The PREDICTS database: a global database of how local terrestrial biodiversity responds to human impacts. *Ecology and Evolution* **4**, 4701-4735, doi:10.1002/ece3.1303 (2014).
